# **Foxn1 overexpression promotes thymic epithelial progenitor cell proliferation and mTEC maintenance, but does not prevent thymic involution**

Jie Li, Lucas P. Wachsmuth<sup>\*</sup>, Shiyun Xiao, Brian G. Condie and Nancy R. Manley<sup>‡</sup>

Department of Genetics, University of Georgia, Athens, GA 30602, USA

<sup>\*</sup>Present address: Department of Pathology, Duke University Medical Center, Durham, NC, USA

<sup>‡</sup>Correspondence to: nmanley@uga.edu

## **Abstract**

The transcription factor FOXN1 is essential for fetal thymic epithelial cell (TEC) differentiation and proliferation. Postnatally, *Foxn1* levels vary widely between TEC subsets, from low/undetectable in putative TEC progenitors to highest in differentiated TEC subsets. Correct *Foxn1* expression is required to maintain the postnatal microenvironment; premature down-regulation of *Foxn1* causes a rapid involution-like phenotype, while transgenic over-expression can cause thymic hyperplasia and/or delayed involution. We investigated a *K5.Foxn1* transgene that drives over-expression in TECs, but neither causes hyperplasia, nor delays or prevents aging-related involution. Similarly, this transgene cannot rescue thymus size in *Foxn1<sup>lacZ/lacZ</sup>* mice that undergo premature involution due to reduced *Foxn1* levels. However, *K5.Foxn1* transgenics do maintain TEC differentiation and cortico-medullary organization with aging, both alone and in *Foxn1<sup>lacZ/lacZ</sup>* mice. Analysis of candidate TEC markers showed co-expression of progenitor and differentiation markers as well as increased proliferation in Plet-1+ TECs associated with *Foxn1* expression. These results demonstrate that the functions of FOXN1 in promoting TEC proliferation and differentiation are separable and context-dependent, and suggest that modulating *Foxn1* levels can regulate the balance of proliferation and differentiation in TEC progenitors.

## Introduction

The thymus provides the essential microenvironment for lineage commitment and development of T cells. Thymic epithelial cells (TECs) include medullary (mTEC) and cortical (cTEC) cells that mediate the homing of lymphoid progenitors and the proliferation, survival, and differentiation of developing T cells. TECs derive from the 3rd pharyngeal pouch endoderm during fetal development, which proliferates to form the thymic rudiment at about E11.5 in mouse embryonic development (Alawam et al., 2020; Gordon and Manley, 2011). In both humans and mice, the thymic rudiment becomes functional only after the transcriptional activation of the *Foxn1* gene in the thymic epithelium (Brissette et al., 1996; Oh et al., 2020; Romano et al., 2013).

FOXN1 is a key transcription factor that controls most aspects of TEC proliferation and differentiation. *Foxn1* is selectively expressed in thymic and skin epithelia, where it regulates the expression of downstream molecular targets to control both growth and differentiation (Brissette et al., 1996). In mice, rats (Nehls et al., 1994), and humans (Romano et al., 2012) null mutations in the *Foxn1* gene (nude) lead to a hairless phenotype and alymphoid cystic thymic dysgenesis due to defective TEC differentiation (Brissette et al., 1996; Kreins et al., 2021; Nehls et al., 1996; Nehls et al., 1994; Rota et al., 2021). In the skin, FOXN1 promotes keratinocyte proliferation and suppresses differentiation, and must be down-regulated for differentiation to proceed (Bukowska et al., 2018; Li et al., 2007). In contrast, in fetal and postnatal TECs FOXN1 is required both for proliferation and for progression of differentiation at multiple stages in cTEC and mTEC sub-lineage development (Nowell et al., 2011; Oh et al., 2020; Su et al., 2003; Vaidya et al., 2016). TECs are exquisitely sensitive to FOXN1 levels, and even small changes in FOXN1 dose can affect phenotypes (Chen et al., 2009; Nowell et al., 2011). Furthermore, maintenance of FOXN1 levels is required for postnatal thymus homeostasis. In *Foxn1<sup>lacZ</sup>* mutant mice, premature postnatal down-regulation of *Foxn1* causes disorganization and atrophy of the thymus similar to premature aging-related thymic involution (Chen et al., 2009) while two different models of transgenic over-expression of *Foxn1* exhibit prolonged maintenance of thymic size, structure, and function, delaying involution (Bredenkamp et al., 2014a; Zook et al., 2011).

It is as yet unclear what the role of FOXN1 is in TEC progenitor/stem cells (TEPCs/TESCs). This uncertainty is in part due to lack of clarity on the unique phenotypes and functional capacity of both fetal and postnatal TEPC. In the fetal thymus, the EpCam+Plet1+

TEC population includes a common thymic epithelial precursor (TEPC), from which both cTECs and mTECs will be subsequently generated (Alawam et al., 2020; Bennett et al., 2002; Gray et al., 2006). As these cells were originally identified based on their phenotype in *Foxn1* null nude mice (Blackburn et al., 1996), it is possible that TESC are *Foxn1* negative, at least initially. Furthermore, TEPC/TEC can persist for long periods in the absence of or under very low *Foxn1* levels, and can be activated by increasing *Foxn1* expression (Bleul et al., 2006; Jin et al., 2014). However, there is also evidence that all TECs express *Foxn1* at some point early in their differentiation (Corbeaux et al., 2010; O'Neill et al., 2016). Furthermore, it is clear that during differentiation both cTEC and mTEC lineages modulate *Foxn1* levels over a wide range (Chen et al., 2009; Hirakawa et al., 2018; Nowell et al., 2011). FOXN1 may have varying effects at different levels in these distinct populations; for example, there is evidence that lower FOXN1 levels preferentially promote proliferation in less mature MHC Class II low (MHCII<sup>lo</sup>) TECs, whereas higher levels promote differentiation into MHCII<sup>hi</sup> populations (Bredenkamp et al., 2014a; Chen et al., 2009; Nowell et al., 2011). Taken together, these and other data support a model in which TESC/TEPCs express at most very low *Foxn1* levels, and that its differential up-regulation controls both TEC proliferation and differentiation at multiple stages of both mTEC and cTEC differentiation. Although understanding these dynamics is critical, neither how *Foxn1* levels are regulated in these different sub-populations nor FOXN1's specific roles across TEC subsets are yet well understood.

In this study, we investigated the quantitative and TEC subset-specific roles of FOXN1 using *K5.Foxn1* transgenic (Weiner et al., 2007), *Foxn1<sup>lacZ</sup>* (Chen et al., 2009), and nude (*Foxn1* null; (Nehls et al., 1994)) mouse strains. We show that the *K5.Foxn1* transgene drives *Foxn1* expression broadly in TECs, resulting in FOXN1 levels 4-6 fold higher than normal. However, unlike previously published overexpression models, this transgene did not result in increased thymus size or delay thymus size reduction with involution in either wild-type or *Foxn1<sup>lacZ/lacZ</sup>* mice. However, *K5.Foxn1* did improve TEC differentiation and thymus function. Importantly, this transgene drove significantly enhanced *Foxn1* expression in Plet1<sup>+</sup> cells that contain putative TEC progenitors. This higher expression resulted in both an expanded Plet1<sup>+</sup> population and their increased proliferation, as well as ectopic expression of the mTEC progenitor marker Cld3,4 (Hamazaki et al., 2007) and mTEC differentiation marker UEA-1 within Plet1<sup>+</sup> cells. In the absence of endogenous *Foxn1*, the *K5.Foxn1* transgene was sufficient to drive formation of a

small thymus, with a bias toward mTEC development and an expanded Cld3,4+ population. These results show that moderate up-regulation of *Foxn1* in TECs broadly biases them toward differentiation without increasing proliferation. Furthermore, *Foxn1* up-regulation within a TESC/TEPC-containing population causes both increased proliferation and misexpression of mTEC markers. Thus, the effects of increasing *Foxn1* levels are context-dependent, a finding that has important implications for efforts to delay thymic involution or rejuvenate the involuted thymus through manipulation of *Foxn1* levels.

## Results

### Increased *Foxn1* expression in *K5.Foxn1* transgenic mice does not prevent thymic involution

The *K5.Foxn1* transgenic mouse line was developed in the Brissette lab to investigate the role of *Foxn1* in skin and hair development by driving its overexpression using a keratin 5 (K5) promoter (Weiner et al., 2007). As K5 is also expressed in multiple populations of TECs, we evaluated thymus phenotypes across aging. We measured the relative increase in *Foxn1* expression at the mRNA level in mTECs (defined as CD45-EpCam+MHC+UEA1+ cells) and cTECs (defined as CD45-EpCam+MHC+UEA1- cells) from *K5.Foxn1*Tg and wild type mice thymi. We used primers specific for the transgene mRNA product, as well as common primers that amplify both the transgenic and endogenous *Foxn1* transcripts. Total expression of *Foxn1* mRNA was increased in TECs from *K5.Foxn1*Tg mice compared to wild type controls (Fig. 1A). Although expression of the endogenous K5 gene in the thymus is primarily restricted to mTECs, the *K5.Foxn1* transgene drives expression in both cTECs (UEA-1-) and mTECs (UEA-1+). *Foxn1* expression in UEA-1+ mTECs increased more than 6-fold, while expression in cTECs increased approximately 4-fold (Fig. 1B). Overall FOXN1 protein levels as detected by immunofluorescence were also clearly increased in both cortex and medulla in transgenic mice (Fig. 1C). Analysis of fluorescence intensity showed increases in both average fluorescence intensity (Fig. 1D) and the proportion of cells with high FOXN1 levels (Fig. 1E) compared to wild type.

This level of overexpression was considerably more modest than those observed in previously reported *Foxn1* overexpression models (>20-fold in (Bredenkamp et al., 2014b; Zook

et al., 2011)), both of which caused increased thymus size and delayed involution. To investigate the effect of this more moderate level of *Foxn1* overexpression effects on the thymus, we first measured thymus size and weight at 1 month and 6 months. To our surprise, thymus size was not changed by the presence of the transgene (Fig. 1F, G). The overall architecture of the transgenic thymus, as examined by either H&E at 1 and 6 months (Fig. 1G), or by Keratin 5 (K5) and Keratin 8 (K8) staining at 1 month, (Fig. 1H) was also not obviously affected. Thymocytes from 1 or 6 month old transgenic mice were similar to wild-type controls in the relative frequencies of CD4<sup>+</sup> or CD8<sup>+</sup> single-positive (SP), CD4<sup>+</sup>8<sup>+</sup> double positive (DP), CD4<sup>-</sup>8<sup>-</sup> double negative (DN) thymocytes, or CD25 and CD44 labeled DN subsets (Fig. 1I, Supplementary Fig. 1). These data indicated that the modest level of overexpression in this model was insufficient to affect steady-state phenotypes, or to prevent or delay involution in general. However, analysis of UEA-1 staining in 1, 6, and 10 month-old mice showed an increase in the frequency and intensity of UEA-1<sup>+</sup> mTEC, both by immunofluorescence (IF) (Fig. 1J-L) and by flow cytometry (Fig. M), with a selective increase in the frequency of UEA-1<sup>+</sup>MHCII<sup>hi</sup> cells (Fig. 1N). These data suggested that while neither initial thymus development, steady-state phenotypes, nor involution as measured by thymus size were affected, mTEC differentiation was maintained better with aging compared to wild-type mice.

### **K5-Foxn1 transgene partially rescues TEC differentiation phenotypes in *Foxn1*<sup>Z/Z</sup> mice**

We have previously reported an allele of *Foxn1*, *Foxn1*<sup>lacZ</sup>, in which insertion of the *lacZ* gene into the 3'UTR results in postnatal premature down regulation of *Foxn1* to levels about 35% of wild-type (Chen et al., 2009) (referred to hereafter as *Foxn1*<sup>Z</sup>). This early down regulation results in premature thymic involution that is phenotypically similar to but much more rapid than normal aging-related involution, including loss of mTEC markers, reduced MHC Class II (MHCII) expression, and disorganization of cortical-medullary structure (Chen et al., 2009). We tested whether increasing *Foxn1* levels using the *K5.Foxn1* transgene in *Foxn1*<sup>Z/Z</sup> mice would prevent or modulate premature involution in this model. As in the *K5.Foxn1* transgenics on a *Foxn1* wild type background, thymus size was not changed by the presence of the transgene at either one or six months of age in either *Foxn1*<sup>+Z</sup> (+/Z) or *Foxn1*<sup>ZZ</sup> (Z/Z) mice (Fig. 2A, B). Both thymocyte and TEC cellularity at 4 weeks of age were similar regardless of presence of the transgene (Supplemental Fig. 2A, 3A). Analysis of the degree to which *Foxn1* expression was

rescued in *Foxn1*<sup>+Z</sup>;*K5.Foxn1* or *Foxn1*<sup>ZZ</sup>;*K5.Foxn1* mice showed that overall *Foxn1* expression was higher in all TEC subsets in *Foxn1*<sup>ZZ</sup>;*K5.Foxn1* mice compared to *Foxn1*<sup>+Z</sup> or *Foxn1*<sup>ZZ</sup> genotypes, resulting in a modest overexpression of 4-5 fold (Fig. 2C). This degree of expression was similar to that of *Foxn1*<sup>+Z</sup>;*K5.Foxn1* TECs. We note that at this stage *Foxn1* expression in *Foxn1*<sup>ZZ</sup> mice does not differ from controls when sorted into TEC subsets by phenotype, despite our previously documenting that the *lacZ* allele is reduced in expression at this time point (Chen et al., 2009). We have consistently observed this phenomenon and conclude that this is a consequence of sorting by phenotypes that are themselves determined by *Foxn1* expression levels.

To further investigate how TEC differentiation in the *Z/Z* mutants was affected by the *K5.Foxn1* transgene, we examined the expression of region-specific markers at 1 and 6 months of age by IHC. For cTECs, we used a cTEC-specific catalytic subunit of thymoproteasome- $\beta$ 5-thymus ( $\beta$ 5t) that is a downstream target of FOXN1 (Uddin et al., 2017; Zuklys et al., 2016) and CD205, an early marker of cTEC differentiation (Baik et al., 2013; Jiang et al., 1995). We used both Keratin 14 (K14) and UEA-1 to evaluate mTEC differentiation, which mark largely non-overlapping mTEC subsets by IHC (Klug et al., 1998).

CD205 was relatively unaffected by changes in *Foxn1* levels in these models at either age (Fig. 2D, E). At 1 month cortical staining for  $\beta$ 5t protein was similar between +/Z and *Z/Z* thymus in the presence and absence of the *K5.Foxn1* transgene, suggesting that the levels of FOXN1 protein in all of these genotypes was still sufficient for  $\beta$ 5t expression (Fig. 2D). However, by 6 months of age  $\beta$ 5t was present at very low levels in *Z/Z* thymus compared +/Z and was up regulated in *K5.Foxn1*;*Z/Z* thymi to levels similar to controls (Fig. 2F).

We previously showed that mTECs in general and UEA-1+ mTECs in particular are decreased in *Z/Z* mutants (Chen et al., 2009). We confirmed this result by both IHC and flow cytometry, in which the fluorescence intensity and % of UEA-1+ mTEC were lower in *Z/Z* compared to +/Z mice at 1 month of age (Fig. 2G, H; Supplementary Fig 2B, C). Addition of the *K5.Foxn1* transgene increased UEA-1+ levels, in both +/Z and *Z/Z* thymi even at 1 month (Fig. 2G). The frequency of UEA1+ cells in both +/Z and *Z/Z* thymi were also increased at one 1 month with the addition of the transgene, and frequency in *K5.Foxn1*;*Z/Z* was rescued to a level similar to +/Z mice (Fig. 2H).

Given the early phenotypes in mTECs, we further investigated mTEC differentiation at 1 month by measuring MHCII and AIRE levels. In both +/Z and Z/Z mice presence of the transgene did not affect the frequency of UEA-1+MHCII<sup>hi</sup> mTECs (Fig. 3A, B). There were however shifts in MHCII<sup>lo</sup> cells specifically in *K5.Foxn1*;Z/Z mice, with more MHCII<sup>lo</sup> mTECs and fewer MHCII<sup>lo</sup> cTECs compared to Z/Z (Fig. 3B). As the total number of TECs was not changed in these mice (Supplementary Fig. 3A), this shift in the frequency of MHCII<sup>lo</sup> mTECs reflected an overall increase in mTEC:cTEC ratio (Fig. 3C). We then evaluated AIRE, a critical mTEC maturation marker, by IHC. AIRE levels decreased more than 5-fold in Z/Z mutants on a per cell basis compared to +/Z in one month old mice (Fig. 3D, E), and the frequency declined more than 2-fold (Fig. 3F, G). Presence of the transgene did not affect AIRE levels in +/Z mTECs, but in *K5.Foxn1*;Z/Z mice both AIRE levels (Fig. 3D, E) and frequency (Fig. 3F, G) were rescued similar to +/Z mice. These data are consistent with other reports that *Aire* expression declines with either aging or with declines in *Foxn1* expression (Coder et al., 2015; Xia et al., 2012).

These data suggest that maintaining and/or increasing *Foxn1* expression using the *K5.Foxn1* transgene prevented the declines in both cTEC and mTEC differentiation in *Foxn1*<sup>Z/Z</sup> mice, with a more substantial positive impact on mTECs.

### **Thymocyte development in *Foxn1*<sup>Z/Z</sup> mice is partially rescued by the *K5.Foxn1* transgene**

In *Foxn1*<sup>Z/Z</sup> mutant mice, the TEC defect results in rapid, cell non-autonomous defects in thymocyte development, including reduced total cellularity, selective reduction in CD4<sup>+</sup> single positive (SP) cells, and decreased DN1a,b/ETP cells (Chen et al., 2009). Since presence of the transgene did impact TEC differentiation, we tested whether the presence of the transgene in +/Z and Z/Z mice improved thymocyte differentiation at 1 and 6 months. Similar to wild-type mice (Fig. 1H), in +/Z heterozygotes presence of the transgene did not significantly change total thymocyte numbers or the numbers or relative frequencies of CD4<sup>+</sup>8<sup>-</sup> double negative (DN), CD4<sup>+</sup>8<sup>+</sup> double positive (DP), or CD4<sup>+</sup> or CD8<sup>+</sup> SP thymocytes (Fig. 4A, B; Supplemental Fig. 3A-C, E, F), or of the DN subsets defined by CD44 and CD25 (DN1-4) (Fig. 4C, D; Supplemental Fig. 3G, H). In *K5.Foxn1*;Z/Z mice, the numbers and frequencies of the DN and DP subsets were also unaffected, although those of both CD4 and CD8 SP thymocytes were

increased slightly, but significantly, relative to *Z/Z* alone at both ages (Fig. 4A, B; Supplemental Fig. 3C).

We have previously reported that within the DN population, *Z/Z* mice have increased frequency of CD44+CD25<sup>-</sup> DN1 cells relative to wild-type and heterozygotes (Fig. 4C, D) (Chen et al., 2009), due to an increase in a specific CD44+CD25<sup>lo</sup> subset (Fig. 4C, red box). This subset likely represents a partial block in DN1-DN2 differentiation, as CD44+CD25<sup>+</sup> (DN2) and CD44-CD25<sup>+</sup> (DN3) cells were decreased (Fig. 4C, D) (Chen et al., 2009; Xiao et al., 2018). Notably, this aberrant DN1 population was absent in *K5.Foxn1;Z/Z* mice (Fig. 4C). Both the DN1 and DN3 frequencies improved in the *K5.Foxn1;Z/Z* mice, although did not reach control levels, and DN2 frequencies did not change (Fig. 4C, D; Supplemental Fig. 3G, H). Since we did not include lineage markers, the DN1 subset in this analysis includes both c-kit<sup>+</sup> (ETP) T lineage progenitors as well as B and NK lineage cells, all of which can be separated by their expression of HSA (CD24) and ckit (Porritt et al., 2004). Analysis of these subsets revealed that the T lineage specific CD24+c-kit<sup>+</sup> DN1a,b/ETP cell population that is decreased in *Z/Z* mutants was partially rescued in *K5.Foxn1;Z/Z* mice at 1 month (Supplementary Fig. 3I, J), and was similar to *+/Z* controls by 6 months (Fig. 4E, F). This rescue could have been due to changes in Dll4 levels, which were rescued to levels similar to *+/Z* controls in *K5.Foxn1;Z/Z* mice (Fig. 4G).

We also assessed the generation of Foxp3<sup>+</sup> regulatory T cells (T<sub>reg</sub>) at 6 months. T<sub>reg</sub> frequencies were similar in *+/Z*, *Z/Z*, and *K5.Foxn1;Z/Z* thymi (Fig. 5). Surprisingly, *K5.Foxn1;+/Z* thymi exhibited markedly increased frequencies and absolute numbers of Foxp3<sup>+</sup> regulatory T cells (Fig. 5., Supplemental Fig. 3D). These Treg cells expressed normal levels of CD4, TCRβ, and Foxp3 (Supplemental Fig. 4A-D). Increases in FOXP3<sup>+</sup> cells were also seen in *K5.Foxn1* transgenics on a WT background, as FOXP3<sup>+</sup> cells declined between 1 and 6 months in WT, but were maintained in *K5.Foxn1* transgenics at 6 months (Supplemental Fig. 4E, F). This result suggests that higher FOXN1 levels create a microenvironment that biases T cell development toward Treg generation, and that the better maintenance of mTEC phenotypes in transgenics sustained Treg generation with aging.

Taken together, these data indicate that presence of the transgene did not affect the major categories of normal thymocyte development in WT or *+/Z* mice, with the exception of increased T<sub>reg</sub> production. In addition, the transgene improved thymocyte differentiation defects in *Z/Z*



mice, especially increasing ETPs to levels similar to controls. This result is consistent with improved, but not normal, TEC phenotypes that better support thymocyte development.

### **The *K5.Foxn1* transgene affects the differentiation and proliferation of putative TEPC**

Several reports have identified Plet-1 as a marker for a population of cells with both cortical and medullary progenitor activity, both at fetal and postnatal stages (Bennett et al., 2002; Gray et al., 2006; Ulyanchenko et al., 2016). In addition, Plet1-Cld3,4<sup>hi</sup> UEA1+ TECs represent progenitors for postnatal mTECs, including AIRE+ mTECs (Hamazaki et al., 2007). Given the improved maintenance of mTEC populations in the presence of the *K5.Foxn1* transgene, we evaluated the impact of the *K5.Foxn1* transgene on these progenitor populations in both wild-type mice and in the context of the *Foxn1*<sup>Z</sup> allele by IHC. The frequency of Plet1+ cells was significantly increased in *K5.Foxn1* transgenic mice compared to WT controls (Fig. 6A, B, Supplemental Fig. 5A, B). When all three markers were evaluated on the +/Z and Z/Z mice with and without the *K5.Foxn1* transgene, Plet1<sup>hi</sup>Cld3<sup>hi</sup>UEA1<sup>hi</sup> mTEC-committed progenitors were present in all genotypes (Fig. 6C, pink arrows). In the +/Z thymus, most Plet1+ cells had a range of Cld3 expression levels and were UEA1- (white arrows), while a minority of these cells were also UEA1<sup>lo</sup> (yellow arrow). Similar results were seen in the Z/Z mutants. In contrast, in both the *K5.Foxn1*;+/Z and *K5.Foxn1*;Z/Z thymi nearly all Plet1+ cells are both Cld3+ and UEA1+ (yellow arrows).

To test whether this co-expression in the presence of the transgene correlated with presence of FOXN1, we performed IHC for FOXN1 and Plet-1. In +/Z and Z/Z mice, 90% of the Plet1<sup>hi</sup> cells were negative for FOXN1 (Fig. 6D, white arrows; Supplemental Fig. 5C). In contrast, in both *K5.Foxn1*;Z/+ and *K4.Foxn1*;Z/Z mice, ~50% of Plet1+ cells were Foxn1+ (Fig. 6D, yellow arrows; Supplemental Fig. 5C), although with a range of levels, indicating that the transgene was driving ectopic *Foxn1* expression in this population that contains TEC progenitors. Since *Foxn1* has been shown to be involved in the regulation of TEC proliferation (Chen et al., 2009; Itoi et al., 2007; O'Neill et al., 2016), we used BrdU incorporation to test whether increased *Foxn1* expression in these cells affected their proliferative status. We found that only 20% of Plet1+ cells in +/Z and Z/Z thymi incorporated BrdU during a 5 day period of exposure, while the majority of Plet1+ TEC in *K5.Foxn1*;+/Z and *K5.Foxn1*;Z/Z thymi were proliferating during this time window (Fig. 6E; Supplementary Fig. 5D). Additional analysis showed that

there was not an overall change in TEC proliferation in either MHC<sup>hi</sup> or MHC<sup>lo</sup> TECs with the presence of *Foxn1* transgene, including in *Z/Z* mice that have reduced MHCII<sup>lo</sup> proliferation (Chen et al., 2009) (Supplemental Fig. 5E, F). Thus, the increase in Plet1+ TEC proliferation was specific to that population.

### **The *K5.Foxn1* transgene is sufficient to induce thymus development in nude mice.**

The *Foxn1* null thymus phenotype (nude) results from an early block in thymus development, with the resulting rudiment composed of both Plet-1+ TEPC and Cld3+UEA-1+ medullary progenitors (Depreter et al., 2008; Hamazaki et al., 2007; Nehls et al., 1996; Nowell et al., 2011). To test whether the *K5.Foxn1* transgene can rescue this phenotype, we crossed it into the nude background. In *K5.Foxn1;nu/nu* mice, the transgene was the only source of *Foxn1* since endogenous *Foxn1* is eliminated by the nude mutation (Nehls et al., 1996). Addition of the transgene to *+/nu* heterozygotes did not significantly impact thymus weight (P=0.073), the number of FOXN1+ cells, or overall cortico-medullary organization (Fig. 7A, B, E-G). IHC for K8 (cTECs), K5, and UEA-1 (mTECs) showed minor disruption of the cortical and medullary organization and regions of K8<sup>lo</sup> TECs in *K5.Foxn1Tg;+/nu* mice (Fig. 7C). Analysis of UEA-1 staining showed that addition of the transgene to *+/nu* increased frequency of UEA1+ mTECs but did not impact Cld3 staining (Fig. 7D), consistent with the results in wt and *+/Z* mice (Figs. 3, 5).

Addition of the transgene in the *nu/nu* thymus caused a dramatic improvement in thymus development. *K5.Foxn1;nu/nu* thymi were clearly larger than in *nu/nu* (Fig. 7A, B), and the number of Foxn1+ cells increased to nearly that of *+/nu* and *K5.Foxn1Tg;+/nu* mice, (Fig. 7E, F), although the density of FOXN1+ cells was increased 2-fold (Fig. 7E, G). FOXN1 expression in TECs is required to recruit endothelial cells and to generate the cellular and molecular environment needed for normal thymic vascularization (Bryson et al., 2013; Mori et al., 2010). In the nude thymus anlagen, no CD31+ cells are detected in the epithelial region (Fig. 7H). All other genotypes showed the presence of vasculature, indicating that transgene-driven TEC differentiation is capable of recruiting vasculature into the thymic rudiment. CD31+ blood vessels also had a higher density in *K5.Foxn1Tg;nu/nu* thymus compared to controls (Fig. 7H, I), consistent with the increased density of FOXN1+ TECs. The restoration of TECs in *K5.Foxn1Tg;nu/nu* mice also supports normal development of CD4, CD8 T cells in the thymus

(Supplemental Fig. 6A-H). The percentage of CD4, CD8 T cells from *K5.Foxn1Tg;nu/nu* spleen was significantly lower than that of controls at two week old mice, but reached similar levels by four weeks old (Supplemental Fig. 6I-L).

The *K5.Foxn1;nu/nu* thymus exhibited restoration of cortical and medullary compartments, with the medulla relatively expanded (Fig. 7B). Consistent with previous reports (Chen et al., 2009), *nu/nu* thymi showed broad expression of K8 with central small numbers of K5+ or UEA-1<sup>lo</sup>Cld3+ cells (Fig. 7C, D). *K5.Foxn1Tg;nu/nu* thymus displayed K8 expression that was similar to *K5.Foxn1Tg;+/nu* thymus, with K8<sup>lo</sup> regions in the cortex and scattered K8+ cells in the medullary regions (Fig. 7C). K5 expression was throughout the medulla but also in scattered cells in the cortex that were primarily K8+ (Fig. 7C) consistent with expansion of a progenitor-containing K8+K5+ population (Klug et al., 2002). In contrast to K5 expression, UEA-1+ mTECs were localized to clearly delineated medullary areas of the *K5.Foxn1Tg;nu/nu* thymus.

Cld3+ cells are present in the nude mouse thymic rudiment, consistent with a previous report that some mTEC lineage divergence occurs in the absence of Foxn1 (Nowell et al., 2011). Our analysis confirmed that Cld3+ cells are present in the *nu/nu* thymus and are mostly UEA-1 negative or low, similar to *+/nu* controls (Fig. 7D). The number and frequency of Cld3+ cells was dramatically expanded in *K5.Foxn1Tg;nu/nu* mice, compared to all other genotypes, the majority of which were UEA1+. This analysis suggested that the majority of mTEC in the *K5.Foxn1Tg;nu/nu* thymus have phenotypes consistent with an mTEC progenitor (Fig. 7D).

In summary, *Foxn1* expression from the transgene is capable of driving substantial thymus differentiation and growth from the nude thymus anlage. The resulting TECs have expanded compartments of cells previously shown to contain TEC progenitors (K8+K5+ and Cld3+ cells), consistent with the transgene driving both proliferation and differentiation of these progenitors.

## Discussion

Given previous data showing that *Foxn1* overexpression in TECs attenuated and delayed thymic involution (Bredenkamp et al., 2014a; Zook et al., 2011), the fact that *Foxn1* overexpression from this *K5.Foxn1* transgene neither causes thymic overgrowth nor impacts the timing or degree of thymus size reduction during involution is surprising. However, this result is

consistent with our data demonstrating that the thymus is highly sensitive to *Foxn1* dosage, as reductions in *Foxn1* mRNA levels of as little as 15% has measurable corresponding reductions in thymus size and TEC phenotypes (Chen et al., 2009). *Foxn1* over expression from the *K5.Foxn1* transgene does have specific impacts on TEC and overall thymus phenotypes with improved mTEC maintenance and expanded TEC progenitor populations on a wild-type background. In addition, this transgene improves proliferation, differentiation, and organization of both cTECs and mTECs in *Foxn1lacZ* homozygous mice, including upregulation of MHCII expression in all TECs. These changes particularly impact mTEC numbers, differentiation, and maintenance. Furthermore, when expressed in *Foxn1* null nude mice the transgene drives sufficient *Foxn1* expression to promote substantial thymus development biased toward mTECs.

So why would expression of the *K5.Foxn1* transgene result in a different phenotype compared to the other published accounts of *Foxn1* over-expression in TEC? There are two main differences between this transgene and the previously published accounts that could underlie this seemingly paradoxical result. First, this transgene drives *Foxn1* expression at a level that is higher than normal endogenous levels, but lower than that reported for the other two transgenes. As *Foxn1* is quite dosage sensitive in loss of function models, it is certainly possible that very high levels of expression are required to cause the thymic overgrowth. Second, the promoter used in this transgene drives *Foxn1* overexpression in progenitors that are usually *Foxn1* low or negative. The two prior reports used either a K14 promoter (Zook et al., 2011) or *Foxn1<sup>Cre</sup>* (Bredenkamp et al., 2014a) to drive *Foxn1* expression, neither of which would drive expression in the earliest TEC progenitors. K5, in contrast, is a known marker of TEC that contain progenitor activity, as well as most or all mTECs (Klug et al., 2002; Ulyanchenko et al., 2016), and our data clearly show that this transgene drives *Foxn1* expression in Plet1+ cells that both have been implicated as progenitors, and are normally *Foxn1* negative (or below the level of detection), and results in their proliferation and relative expansion. Both features of this transgene could contribute to observed phenotypes; the expression in both bipotent Plet1+ progenitors and Cld3+ mTEC progenitors (both of which are present in the absence of *Foxn1*) could bias them towards proliferation, while the modest overexpression in immature TEC (likely contained within the MHCII<sup>lo</sup> compartment) is insufficient to cause the expansion phenotypes seen under conditions of significantly higher *Foxn1* overexpression driven by the K14 or *Foxn1* promoters in other studies. This combination of effects in different TEC populations could result

in the failure to observe thymus overgrowth while driving the expansion of progenitors, both in the K5.*Foxn1* transgenics alone, and in combination with the *Foxn1*<sup>Z/Z</sup> mutation.

Other than its effects on progenitors, increased FOXN1 levels via the K5.*Foxn1* transgene had the most obvious effects on the mTEC sublineage in the postnatal thymus. In addition to causing expansion of Cldn3<sup>+</sup> mTEC progenitors, the transgene appears to bias TEC differentiation directly toward the mTEC lineage, with increased expression of mTEC markers in the Plet1<sup>+</sup> compartment. In addition, both UEA1 and Aire mTEC differentiation markers are up-regulated more broadly in mTECs. The up-regulation of Aire, both in numbers and on a per cell basis, is particularly important, as it could indicate an impact on self-tolerance. The efficiency of negative selection is dependent on the presentation of peripheral tissue-specific self-antigens (TSA) (Klein et al., 2014), the expression of which is in part regulated by the *Aire* gene in mTECs (Koh et al., 2018; Peterson et al., 2008). Postnatal reduction of *Foxn1* levels in the Z/Z mice induces loss of mTECs and reduces both the numbers of Aire<sup>+</sup> mTECs and its expression level, both of which are increased with *Foxn1* overexpression. Although there is no evidence that *Aire* is itself a direct target of FOXN1 (Zuklys et al., 2016), these data support the idea that *Aire* expression is dependent on, and correlated with, FOXN1 levels.

An effect on negative selection is also indicated by the dramatic increase in the production of FOXP3<sup>+</sup> T<sub>reg</sub>, which are an important component of peripheral tolerance, and are generated in the thymus by diverting cells from apoptosis during the process of negative selection. Other than this phenotype, the main effects of the transgene on thymocyte differentiation were relatively mild, although consistent with known roles for FOXN1-dependent processes. No significant differences in the main thymocyte stages defined by CD4 and CD8 were seen between +/Z controls and K5.*Foxn1*;+/Z transgenics; this is consistent with the relatively minor effects on TEC differentiation and the lack of any change in thymus size. However, the increased *Foxn1* expression from the transgene did fully or partially rescue the thymocyte differentiation phenotypes seen in the Z/Z mice. In particular, the frequency of DN1a,b/ETP progenitors was recovered consistent with its dependence on the expression of *Dl4*, a known *Foxn1* direct target, on cTECs (Zuklys et al., 2016). These results are consistent with the idea that most aspects of thymocyte differentiation are sensitive to reduced *Foxn1* dose but may be relatively insensitive to increased *Foxn1* levels.

Efforts to generate TECs via either directed differentiation or reprogramming continue to be of interest, as do targeting the *in vivo* thymus for rejuvenation via a variety of approaches towards the therapeutic goal of improving immune function after damage or with aging. The results from this study highlight the critical importance of carefully controlling both target cell type and *Foxn1* dosage in these attempts. While high levels of overexpression cause thymic overgrowth that does increase output but can be detrimental, the lower levels of expression and targeting to progenitors shown here did not result in overgrowth, despite the expansion of progenitor populations. This overexpression did maintain and improves thymic phenotypes, especially in the medulla, without overgrowth. These results demonstrate that the effects of *Foxn1* overexpression are pleiotropic and differ depending on the cell type and level of expression.

## Materials and methods

### *Mice*

The *Foxn1<sup>lacZ</sup>* allele was generated by the Manley lab (Chen et al., 2009), and may be obtained by contacting Dr. Manley upon completion of a simple MTA agreement for academic users. Nude mice (*Foxn1<sup>nu</sup>*) were purchased from The Jackson Laboratory Animal Resource Unit, Bar Harbor, ME. Genotyping for both alleles was as described (Chen et al., 2009). The *K5.Foxn1* transgenic line was provided by Dr. Janice L. Brissette (to whom inquiries should be addressed), and was genotyped by PCR as previously reported (Weiner et al., 2007). All experiments using animals received prior review and approval by the UGA institutional IACUC in accordance with AALAC accreditation guidelines.

### *Antibodies*

The following antibodies were used in this study: anti-CD4 (GK1.5, Biolegend, 248, lot100406, 1:150), anti-CD8 (53-6.7, Biolegend, 155, lot100708, 1:150), anti-CD25 (PC61, Biolegend, 4262, lot102030, 1:150), anti-CD44 (IM7, Biolegend, 312, lot103012, 1:150), anti-K5 (AF138, Covance,

<https://www.bioz.com/result/polyclonal%20rabbit%20anti%20k5%20af138/product/Covance>,

1:500), anti-K8 (provided by Dr. Ellen Riche, Texas), anti-Foxn1 (G20, Santa Cruz, <https://www.scbt.com/p/foxn1-antibody-g-20>, 1:200), anti-β5t (PD021, MLB, 1:100),

biotinylated UEA1 (Vector Labs, B-1065-2, 1:400), anti-CD205 (dp200, Abcam, EPR5233, lot ab124897, 1:100), anti-K14 (AF64, Covance, <https://www.informatics.jax.org/antibody/key/2068>, 1:500), anti-CD45 (30-F11; Biolegend, 97, lot 103112, 1:150), anti-EpCAM (G8.8, Biolegend, 4726, lot 118206, 1:150), anti-I-A/I-E (M5/114.15.2, Biolegend, 366, lot 107606, 1:150), anti-Aire (M-300, Santa Cruz, sc-33189, 1:200), anti-CD24 (M1/69, Biolegend, 343, lot 101808, 1:150), anti-CD117 (2B8, Biolegend, 1945, lot 105812, 1:150), anti-CD19 (6D5, Biolegend, 1530, lot 115508, 1:150), anti-Foxp3 (FJK-16s, eBioscience, <https://www.thermofisher.com/antibody/product/FOXP3-Antibody-clone-FJK-16s-Monoclonal/14-5773-82>, 1:200), Plet1 (made by our Lab), anti-Claudin3 (PA5-32353, Invitrogen, <https://www.thermofisher.com/antibody/product/Claudin-3-Antibody-Polyclonal/PA5-32353>, 1:100), anti-BrdU (3D4, RUO, BD Pharmingen, 1:100), anti-CD31 (MEC 13.3, RUO, BD Pharmingen, 1:100). Fluorochrome-conjugated anti-Ig second step reagents were purchased from Jackson ImmunoResearch (West Grove, PA). Binding of biotinylated Abs was detected by fluorochrome-conjugated streptavidin (Invitrogen).

### ***Thymic stromal cell isolation by enzymatic digestion***

Thymic stromal cells were isolated as described previously (Chen et al., 2009). Briefly, adult thymi were minced, digested in collagenase (Roche, Basel, Switzerland), then collagenase/dispase (Roche) and passed through 100- $\mu$ m mesh to remove debris.

### ***Immunohistology***

Serial frozen sections (10  $\mu$ m) from mouse thymus were air dried for 30 min before acetone fixation. Thin sections were blocked with normal serum and subsequently incubated with optimal dilutions of primary Abs for at least 1 hour at room temperature before washing and incubation with appropriate fluorochrome-conjugated secondary reagents. Controls included slides incubated with nonimmune species matched Ig or isotype-matched mouse Ig. For multiple Ab staining, the sections were incubated simultaneously with primary Abs from different species. Microscopic analysis was performed with a Zeiss Axioplan2 microscope or Zeiss LSM 710 (Zeiss, Melville, NY).

### ***Flow cytometry***

Cells in PBS containing 2% FBS and 0.1% sodium azide were incubated with directly conjugated or biotinylated Abs on ice for 30 min followed by two washes. Binding of biotinylated Ab was detected with PerCp-SA. Cells were analyzed with a Cyan flow cytometer (Miami, FL) equipped with an argon laser (488 nm) for FITC and PE excitation and a heliumneon laser (633 nm) for APC and PerCp-SA excitation. Data were collected on using a four-decade log amplifier and were stored in list mode for subsequent analysis using Flowjo Software.

### ***Bromodeoxyuridine (BrdU) treatment and staining***

Incorporation was initiated by intraperitoneal injection of BrdU (1 mg in PBS; Sigma, St Louis, MO) and maintained in drinking water for 5 days (0.8 mg/mL BrdU). Thymic stromal cells were isolated and surface labeled, then fixed in 1% paraformaldehyde, 0.01% Tween-20 (BDH Laboratory Supplies) in PBS overnight at 4°C. Cells were washed in PBS, recovered by centrifugation, and incubated in DNase I (50 Kunitz; Roche) for 30 minutes at 37°C. After washing, cells were stained with FITC-conjugated anti-BrdU (BD Biosciences) for 1 hour at room temperature. For immune-fluorescent staining, to detect BrdU incorporation, thymic sections were incubated in 2 N HCl for 20 min at room temperature. After washing in PBS, the sections were incubated with mouse anti-BrdU (B-D Sciences, San Jose, CA) for 1 h at room temperature followed by incubation with FITC anti-mouse-IgG (Jackson ImmunoResearch).

### ***Quantitative PCR***

Total RNA from sorted CD45-EpCam+UEA1+ and CD45-EpCam+UEA1- thymic stromal cells from 4-week-old mice (Supplemental Fig. 7) were isolated using the RNEasy kit (Qiagen). cDNA was synthesized from the total RNA and used as a template for real-time relative quantitation for Foxn1 and DLL4 using commercially available probes and reagents (Invitrogen) on an Applied Biosystems 7500 Real Time PCR System.

### ***Fluorescent analysis by Image J***

All fluorescent intensity and cell density on IHC were analyzed by using free software Image J (Supplemental Fig. 8)



## ***Statistics***

Data are presented as the mean and SEM. Comparisons between two groups were made using Student's t Test, or ANOVA for multiple group comparisons.  $P < 0.05$  was considered significant.

## **References**

- Alawam, A.S., Anderson, G., Lucas, B., 2020. Generation and Regeneration of Thymic Epithelial Cells. *Front Immunol* 11, 858.
- Baik, S., Jenkinson, E.J., Lane, P.J., Anderson, G., Jenkinson, W.E., 2013. Generation of both cortical and Aire(+) medullary thymic epithelial compartments from CD205(+) progenitors. *Eur J Immunol* 43, 589-594.
- Bennett, A.R., Farley, A., Blair, N.F., Gordon, J., Sharp, L., Blackburn, C.C., 2002. Identification and characterization of thymic epithelial progenitor cells. *Immunity* 16, 803-814.
- Blackburn, C.C., Augustine, C.L., Li, R., Harvey, R.P., Malin, M.A., Boyd, R.L., Miller, J.F., Morahan, G., 1996. The nu gene acts cell-autonomously and is required for differentiation of thymic epithelial progenitors. *Proc Natl Acad Sci U S A* 93, 5742-5746.
- Bleul, C.C., Corbeaux, T., Reuter, A., Fisch, P., Monting, J.S., Boehm, T., 2006. Formation of a functional thymus initiated by a postnatal epithelial progenitor cell. *Nature* 441, 992-996.
- Bredenkamp, N., Nowell, C.S., Blackburn, C.C., 2014a. Regeneration of the aged thymus by a single transcription factor. *Development* 141, 1627-1637.
- Bredenkamp, N., Ulyanchenko, S., O'Neill, K.E., Manley, N.R., Vaidya, H.J., Blackburn, C.C., 2014b. An organized and functional thymus generated from FOXP1-reprogrammed fibroblasts. *Nat Cell Biol* 16, 902-908.
- Brisette, J.L., Li, J., Kamimura, J., Lee, D., Dotto, G.P., 1996. The product of the mouse nude locus, Whn, regulates the balance between epithelial cell growth and differentiation. *Genes Dev* 10, 2212-2221.
- Bryson, J.L., Griffith, A.V., Hughes, B., 3rd, Saito, F., Takahama, Y., Richie, E.R., Manley, N.R., 2013. Cell-autonomous defects in thymic epithelial cells disrupt endothelial-perivascular cell interactions in the mouse thymus. *PLoS One* 8, e65196.

Bukowska, J., Kopcewicz, M., Walendzik, K., Gawronska-Kozak, B., 2018. Foxn1 in Skin Development, Homeostasis and Wound Healing. *Int J Mol Sci* 19.

Chen, L., Xiao, S., Manley, N.R., 2009. Foxn1 is required to maintain the postnatal thymic microenvironment in a dosage-sensitive manner. *Blood* 113, 567-574.

Coder, B.D., Wang, H., Ruan, L., Su, D.M., 2015. Thymic involution perturbs negative selection leading to autoreactive T cells that induce chronic inflammation. *J Immunol* 194, 5825-5837.

Corbeaux, T., Hess, I., Swann, J.B., Kanzler, B., Haas-Assenbaum, A., Boehm, T., 2010. Thymopoiesis in mice depends on a Foxn1-positive thymic epithelial cell lineage. *Proc Natl Acad Sci U S A* 107, 16613-16618.

Depreter, M.G., Blair, N.F., Gaskell, T.L., Nowell, C.S., Davern, K., Pagliocca, A., Stenhouse, F.H., Farley, A.M., Fraser, A., Vrana, J., Robertson, K., Morahan, G., Tomlinson, S.R., Blackburn, C.C., 2008. Identification of Plet-1 as a specific marker of early thymic epithelial progenitor cells. *Proc Natl Acad Sci U S A* 105, 961-966.

Gordon, J., Manley, N.R., 2011. Mechanisms of thymus organogenesis and morphogenesis. *Development* 138, 3865-3878.

Gray, D.H., Seach, N., Ueno, T., Milton, M.K., Liston, A., Lew, A.M., Goodnow, C.C., Boyd, R.L., 2006. Developmental kinetics, turnover, and stimulatory capacity of thymic epithelial cells. *Blood* 108, 3777-3785.

Hamazaki, Y., Fujita, H., Kobayashi, T., Choi, Y., Scott, H.S., Matsumoto, M., Minato, N., 2007. Medullary thymic epithelial cells expressing Aire represent a unique lineage derived from cells expressing claudin. *Nat Immunol* 8, 304-311.

Hirakawa, M., Nagakubo, D., Kanzler, B., Avilov, S., Krauth, B., Happe, C., Swann, J.B., Nusser, A., Boehm, T., 2018. Fundamental parameters of the developing thymic epithelium in the mouse. *Sci Rep* 8, 11095.

Itoi, M., Tsukamoto, N., Amagai, T., 2007. Expression of Dll4 and CCL25 in Foxn1-negative epithelial cells in the post-natal thymus. *Int Immunol* 19, 127-132.

Jiang, W., Swiggard, W.J., Heufler, C., Peng, M., Mirza, A., Steinman, R.M., Nussenzweig, M.C., 1995. The receptor DEC-205 expressed by dendritic cells and thymic epithelial cells is involved in antigen processing. *Nature* 375, 151-155.

Jin, X., Nowell, C.S., Ulyanchenko, S., Stenhouse, F.H., Blackburn, C.C., 2014. Long-term persistence of functional thymic epithelial progenitor cells in vivo under conditions of low FOXP1 expression. *PLoS One* 9, e114842.

Klein, L., Kyewski, B., Allen, P.M., Hogquist, K.A., 2014. Positive and negative selection of the T cell repertoire: what thymocytes see (and don't see). *Nat Rev Immunol* 14, 377-391.

Klug, D.B., Carter, C., Crouch, E., Roop, D., Conti, C.J., Richie, E.R., 1998. Interdependence of cortical thymic epithelial cell differentiation and T-lineage commitment. *Proc Natl Acad Sci U S A* 95, 11822-11827.

Klug, D.B., Carter, C., Gimenez-Conti, I.B., Richie, E.R., 2002. Cutting edge: thymocyte-independent and thymocyte-dependent phases of epithelial patterning in the fetal thymus. *J Immunol* 169, 2842-2845.

Koh, A.S., Miller, E.L., Buenrostro, J.D., Moskowitz, D.M., Wang, J., Greenleaf, W.J., Chang, H.Y., Crabtree, G.R., 2018. Rapid chromatin repression by Aire provides precise control of immune tolerance. *Nat Immunol* 19, 162-172.

Kreins, A.Y., Maio, S., Dhalla, F., 2021. Inborn errors of thymic stromal cell development and function. *Semin Immunopathol* 43, 85-100.

Li, J., Baxter, R.M., Weiner, L., Goetinck, P.F., Calautti, E., Brissette, J.L., 2007. Foxn1 promotes keratinocyte differentiation by regulating the activity of protein kinase C. *Differentiation* 75, 694-701.

Mori, K., Itoi, M., Tsukamoto, N., Amagai, T., 2010. Foxn1 is essential for vascularization of the murine thymus anlage. *Cell Immunol* 260, 66-69.

Nehls, M., Kyewski, B., Messerle, M., Waldschutz, R., Schuddekopf, K., Smith, A.J., Boehm, T., 1996. Two genetically separable steps in the differentiation of thymic epithelium. *Science* 272, 886-889.

Nehls, M., Pfeifer, D., Schorpp, M., Hedrich, H., Boehm, T., 1994. New member of the winged-helix protein family disrupted in mouse and rat nude mutations. *Nature* 372, 103-107.

Nowell, C.S., Bredenkamp, N., Tetelin, S., Jin, X., Tischner, C., Vaidya, H., Sheridan, J.M., Stenhouse, F.H., Heussen, R., Smith, A.J., Blackburn, C.C., 2011. Foxn1 regulates lineage progression in cortical and medullary thymic epithelial cells but is dispensable for medullary sublineage divergence. *PLoS Genet* 7, e1002348.

O'Neill, K.E., Bredenkamp, N., Tischner, C., Vaidya, H.J., Stenhouse, F.H., Peddie, C.D., Nowell, C.S., Gaskell, T., Blackburn, C.C., 2016. Foxn1 Is Dynamically Regulated in Thymic Epithelial Cells during Embryogenesis and at the Onset of Thymic Involution. *PLoS One* 11, e0151666.

Oh, J., Wang, W., Thomas, R., Su, D.M., 2020. Thymic rejuvenation via FOXN1-reprogrammed embryonic fibroblasts (FREFs) to counteract age-related inflammation. *JCI Insight* 5.

Peterson, P., Org, T., Rebane, A., 2008. Transcriptional regulation by AIRE: molecular mechanisms of central tolerance. *Nat Rev Immunol* 8, 948-957.

Porritt, H.E., Rumfelt, L.L., Tabrizifard, S., Schmitt, T.M., Zuniga-Pflucker, J.C., Petrie, H.T., 2004. Heterogeneity among DN1 prothymocytes reveals multiple progenitors with different capacities to generate T cell and non-T cell lineages. *Immunity* 20, 735-745.

Romano, R., Palamaro, L., Fusco, A., Giardino, G., Gallo, V., Del Vecchio, L., Pignata, C., 2013. FOXN1: A Master Regulator Gene of Thymic Epithelial Development Program. *Front Immunol* 4, 187.

Romano, R., Palamaro, L., Fusco, A., Iannace, L., Maio, S., Vigliano, I., Giardino, G., Pignata, C., 2012. From murine to human nude/SCID: the thymus, T-cell development and the missing link. *Clin Dev Immunol* 2012, 467101.

Rota, I.A., Handel, A.E., Maio, S., Klein, F., Dhalla, F., Deadman, M.E., Cheuk, S., Newman, J.A., Michaels, Y.S., Zuklys, S., Prevot, N., Hublitz, P., Charles, P.D., Gkazi, A.S., Adamopoulou, E., Qasim, W., Davies, E.G., Hanson, I., Pagnamenta, A.T., Camps, C., Dreau, H.M., White, A., James, K., Fischer, R., Gileadi, O., Taylor, J.C., Fulga, T., Lagerholm, B.C., Anderson, G., Sezgin, E., Hollander, G.A., 2021. FOXN1 forms higher-order nuclear condensates displaced by mutations causing immunodeficiency. *Sci Adv* 7, eabj9247.

Su, D.M., Navarre, S., Oh, W.J., Condie, B.G., Manley, N.R., 2003. A domain of Foxn1 required for crosstalk-dependent thymic epithelial cell differentiation. *Nat Immunol* 4, 1128-1135.

Uddin, M.M., Ohigashi, I., Motosugi, R., Nakayama, T., Sakata, M., Hamazaki, J., Nishito, Y., Rode, I., Tanaka, K., Takemoto, T., Murata, S., Takahama, Y., 2017. Foxn1-beta5t transcriptional axis controls CD8(+) T-cell production in the thymus. *Nat Commun* 8, 14419.

Ulyanchenko, S., O'Neill, K.E., Medley, T., Farley, A.M., Vaidya, H.J., Cook, A.M., Blair, N.F., Blackburn, C.C., 2016. Identification of a Bipotent Epithelial Progenitor Population in the Adult Thymus. *Cell Rep* 14, 2819-2832.

Vaidya, H.J., Briones Leon, A., Blackburn, C.C., 2016. FOXP1 in thymus organogenesis and development. *Eur J Immunol* 46, 1826-1837.

Weiner, L., Han, R., Scicchitano, B.M., Li, J., Hasegawa, K., Grossi, M., Lee, D., Brissette, J.L., 2007. Dedicated epithelial recipient cells determine pigmentation patterns. *Cell* 130, 932-942.

Xia, J., Wang, H., Guo, J., Zhang, Z., Coder, B., Su, D.M., 2012. Age-Related Disruption of Steady-State Thymic Medulla Provokes Autoimmune Phenotype via Perturbing Negative Selection. *Aging Dis* 3, 248-259.

Xiao, S., Zhang, W., Manley, N.R., 2018. Thymic B cell development is controlled by the B potential of progenitors via both hematopoietic-intrinsic and thymic microenvironment-intrinsic regulatory mechanisms. *PLoS One* 13, e0193189.

Zook, E.C., Krishack, P.A., Zhang, S., Zeleznik-Le, N.J., Firulli, A.B., Witte, P.L., Le, P.T., 2011. Overexpression of Foxp1 attenuates age-associated thymic involution and prevents the expansion of peripheral CD4 memory T cells. *Blood* 118, 5723-5731.

Zuklys, S., Handel, A., Zhanybekova, S., Govani, F., Keller, M., Maio, S., Mayer, C.E., Teh, H.Y., Hafen, K., Gallone, G., Barthlott, T., Ponting, C.P., Hollander, G.A., 2016. Foxp1 regulates key target genes essential for T cell development in postnatal thymic epithelial cells. *Nat Immunol* 17, 1206-1215.

# Figures

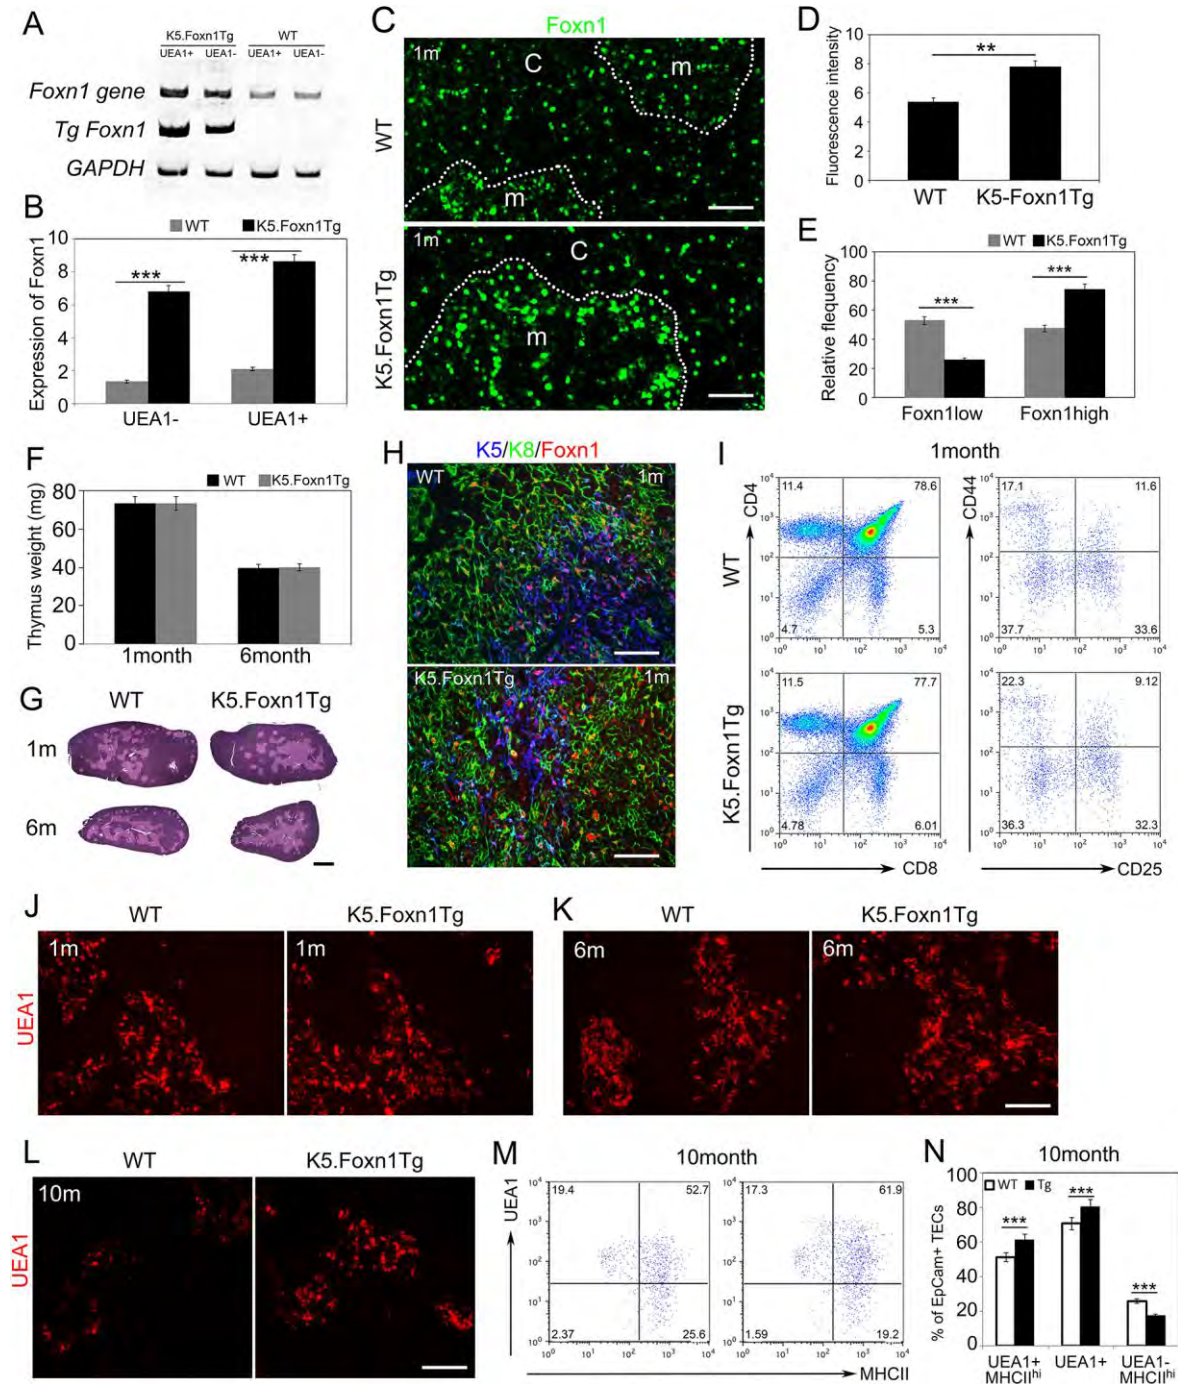

**Fig. 1. Expression and phenotypes of *K5.Foxn1* in a wild-type background.** The *K5.Foxn1* transgene is indicated in all figures as “Tg+”. All ages are 1 month unless otherwise indicated on the figure panels. **(A)** RT-PCR of endogenous- and tg-expressed *Foxn1* in thymic epithelial cells. **(B)** RT-PCR analysis of total *Foxn1* expression in sorted TEC subsets from WT and *K5.Foxn1* thymi. \*\*\*P<0.005. (n=5) **(C)** Paraffin sections from WT and *K5.Foxn1* Tg+ stained with a FOXN1 antibody (green). **(D)** Quantification of fluorescence intensity of FOXN1 in *K5.Foxn1* transgenic thymus. \*\*P<0.01. (n=10) **(E)** Relative frequency of FOXN1hi cells increased in *K5.Foxn1* TECs. \*\*\*P<0.005. (n=10) **(F)** Thymus wet weight in *K5.Foxn1* Tg+ and WT mice. **(G)** Hematoxylin- and eosin-stained paraffin sections of thymi from *K5.Foxn1*Tg+ and WT mice. **(H)** IHC of K8 (green), K5 (blue), and FOXN1 (red) on *K5.Foxn1*Tg+ and WT thymi. **(I)** FACS profiles of CD4, CD8, CD25, and CD44 expression in *K5.Foxn1*Tg+ and WT thymocytes. (n=11) **(J-L)** Fluorescent immunostaining of UEA1 on one **(J)**, six **(K)**, and 10 month **(L)** *K5.Foxn1*Tg+ and WT thymi. **(M,N)** Flow cytometric analysis of UEA1 shows increased density and percentage of UEA1+ TECs in *K5.Foxn1*Tg mouse thymus compared with WT. \*\*\*P<0.005. (n=6) Scale bars=100um. Statistical analyses were carried out using one-way Student’s t Test. Data are mean±s.e.m. All paired images are shown at same magnification.

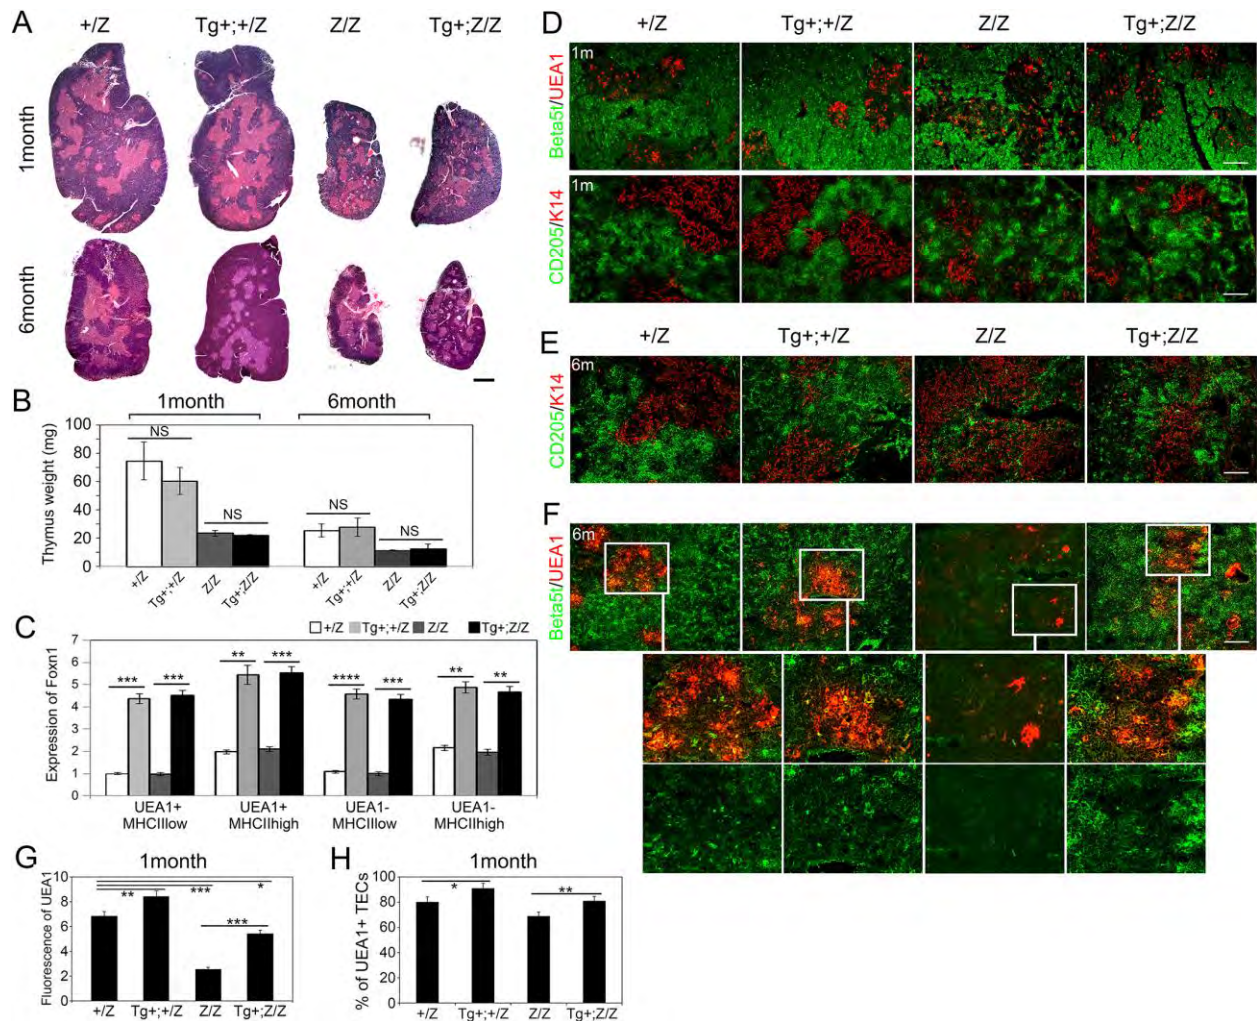

**Fig. 2. *K5.Foxn1* transgene improves *Foxn1*<sup>Z/Z</sup> induced thymic involution.** The *Foxn1*<sup>Z</sup> allele is indicated in all figures as “Z”. All ages are indicated on figure panels. (A) Hematoxylin-and eosin-stained paraffin sections of thymi from +/Z, *K5.Foxn1*Tg+;+/Z, Z/Z and *K5.Foxn1*Tg+;Z/Z mice. Scale bar=200µm. (B) Thymus wet weight in +/Z, *K5.Foxn1*Tg+;+/Z, Z/Z and *K5.Foxn1*Tg+;Z/Z mice. The *K5.Foxn1* transgene did not induce significant increase in thymus weight. (C) RT-PCR analysis of total *Foxn1* expression in sorted TEC subsets from +/Z, Tg+;+/Z, Z/Z and Tg+;Z/Z thymi. \*\*P<0.01, \*\*\*P<0.005 \*\*\*\*P<0.001. (n=6) (D) Cryosections from one month old thymi stained for Beta5t (green) and UEA-1 (red) or, CD205 (green) and K14 (red). (E) CD205 (green) and K14 (red). (F) Cryosections from six month old thymi stained for Beta5t (green) and UEA-1 (red) or, (G) Fluorescence intensity of UEA1 in +/Z,



*K5.Foxn1*Tg<sup>+</sup>;+/Z, Z/Z and *K5.Foxn1*Tg<sup>+</sup>;Z/Z thymus. \*P<0.05, \*\*P<0.01, \*\*\*P<0.005 \*\*\*\*P<0.001. (n=7) **(H)** Percentage of UEA1 expressed cells in +/Z, Tg<sup>+</sup>;+/Z, Z/Z, and Tg<sup>+</sup>;Z/Z thymic epithelial cells. \*P<0.05, \*\*P<0.01. (n=7) Scale bars=100μm. Statistical analyses were carried out using one-way ANOVA with multiple comparison testing. Data are mean±s.e.m. All paired images are shown at same magnification.

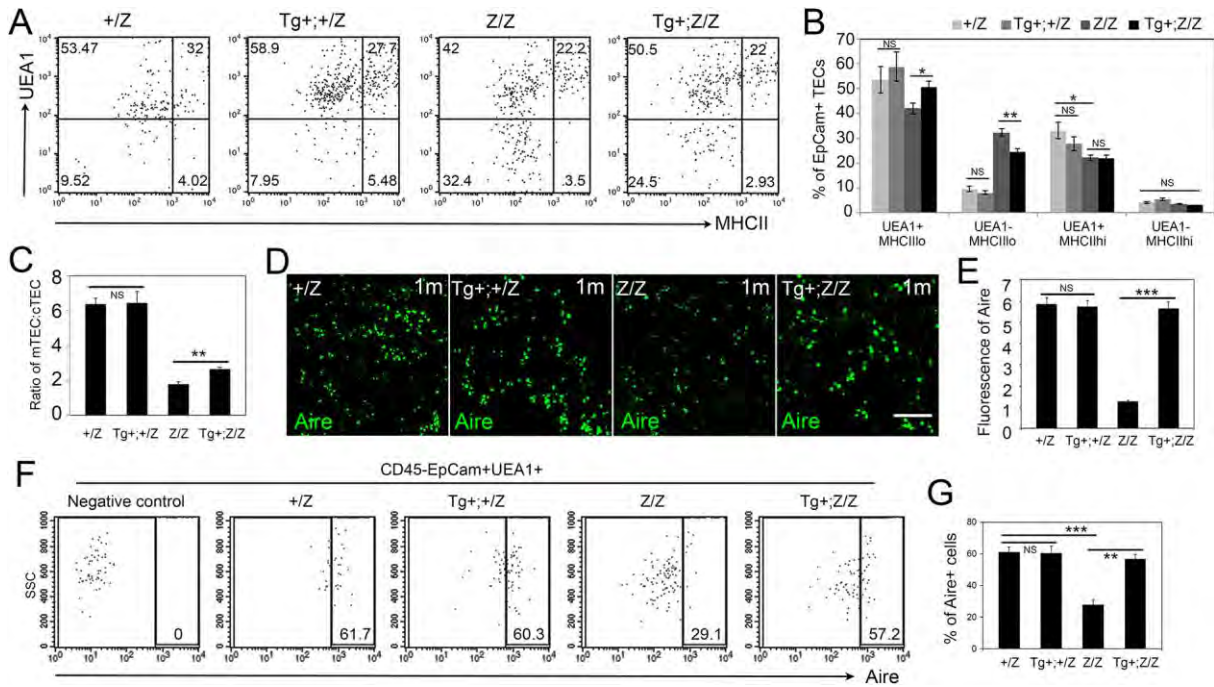

**Fig. 3. TEC phenotypes in *K5.Foxn1;Foxn1<sup>Z/Z</sup>* mice.** All data collected from one month old mice. **(A)** FACS profile of gated CD45-EpCam<sup>+</sup> epithelial cells from one month thymi stained for MHCII and UEA-1. **(B)** Frequencies of TEC subsets based on UEA-1 and MHCII staining of EpCam<sup>+</sup> TEC from +/Z, *K5.Foxn1*Tg+;+/Z, Z/Z and *K5.Foxn1*Tg+;Z/Z thymus. \*P<0.05, \*\*P<0.01. (n=5) **(C)** Ratio of mTECs:cTECs in +/Z, *K5.Foxn1*Tg+;+/Z, Z/Z and *K5.Foxn1*Tg+;Z/Z thymus. \*\*P<0.01. (n=5) **(D)** Cryosections stained for AIRE (green). The number and intensity of AIRE<sup>+</sup> cells were decreased in Z/Z mutants, and rescued by transgene expression. Scale bar=50μm. **(E)** Fluorescence intensity show AIRE levels were rescued by the *K5.Foxn1* transgene in Z/Z thymus. \*\*\*P<0.005. (n=7) **(F)** Percentage of AIRE<sup>+</sup> cells in gated CD45-EpCam<sup>+</sup>UEA1<sup>+</sup> thymic epithelial cells. **(G)** Gating strategy for AIRE<sup>+</sup> cells in CD45-EpCam<sup>+</sup>UEA1<sup>+</sup> thymic epithelial cells. \*\*P<0.01, \*\*\*P<0.005. (n=5) Statistical analyses were carried out using one-way ANOVA with multiple comparison testing. Data are mean±s.e.m. All paired images are shown at same magnification.

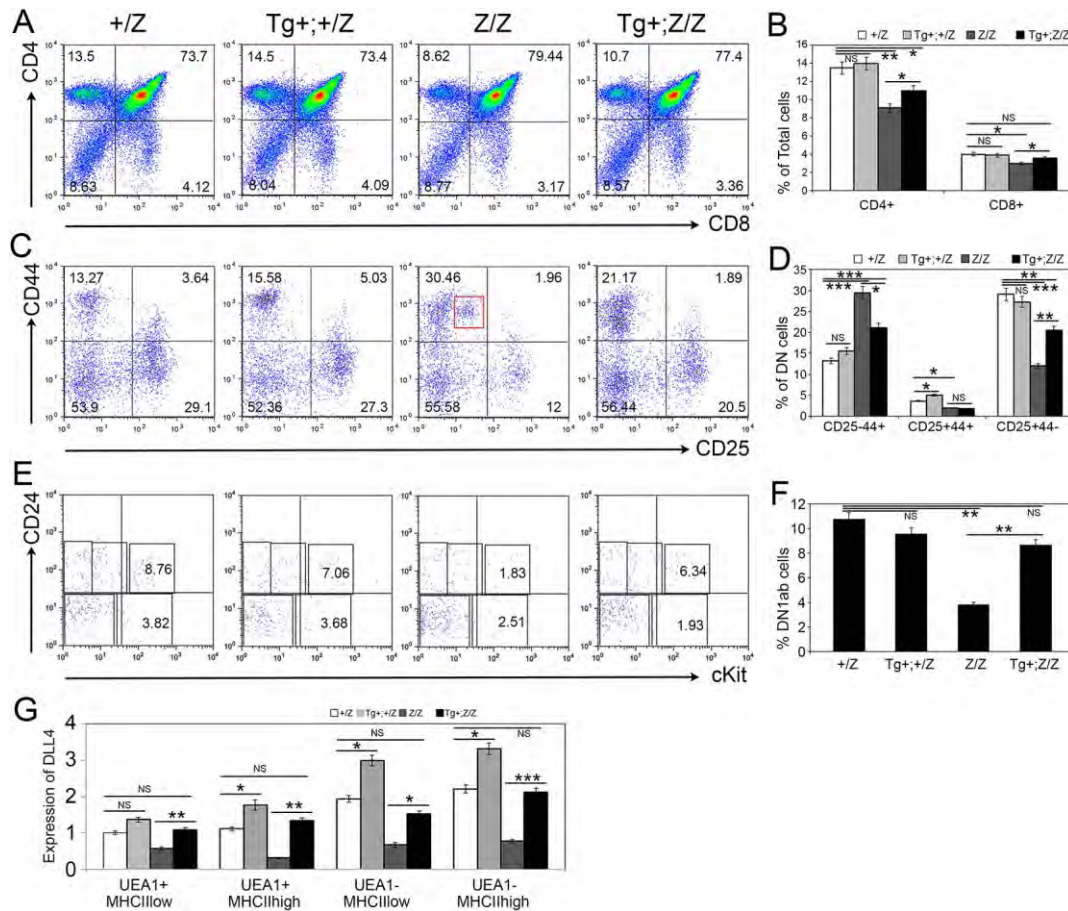

**Fig. 4. Thymocyte phenotypes were partially rescued by *K5.Foxn1* expression in *Foxn1*<sup>Z/Z</sup> mutants.** A-F mice are 6 months old. (n=8) (A) Profile of CD4 and CD8 expression in +/Z, Tg+;+/Z, Z/Z and Tg+;Z/Z thymocytes. (B) The percentage of CD4 and CD8 expressed cells in +/Z, Tg+;+/Z, Z/Z and Tg+;Z/Z thymocytes. \*P<0.05, \*\*P<0.01, (C) Profile of CD25 and CD44 expression in gated CD4-CD8- thymocytes. (D) Graph of the percentage of CD25 and CD44 expressed CD4-CD8- cells. \*P<0.05, \*\*P<0.01, \*\*\*P<0.005. (E) Gated lin-CD25-CD44+ thymocytes stained for CD24 and CD117 expression. (F) Graph of the percentage of CD117<sup>+</sup>CD24<sup>high</sup> and CD117<sup>+</sup>CD24<sup>low</sup> cells in +/Z, Tg+;+/Z, Z/Z and Tg+;Z/Z mice. \*P<0.05, \*\*P<0.01. (G) RT-PCR analysis of total *Foxn1* expression in sorted TEC subsets from +/Z, Tg+;+/Z, Z/Z and Tg+;Z/Z thymi. Mice are one month old. \*P<0.05, \*\*P<0.01, \*\*\*P<0.005. (n=6) Statistical analyses were carried out using one-way ANOVA with multiple comparison testing. Data are mean±s.e.m.

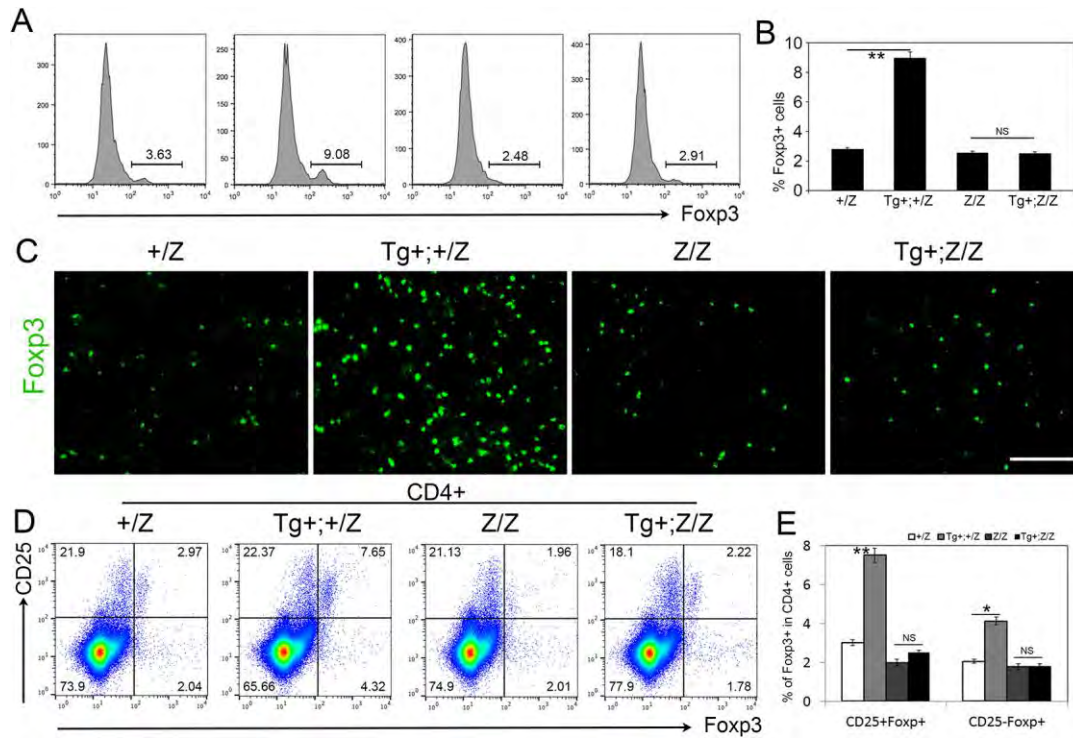

**Fig. 5. Regulatory T cells increase in *K5.Foxn1* thymus but not in *K5.Foxn1;Foxn1<sup>Z/Z</sup>* mutants.** (A) FOXP3 in gated CD45<sup>+</sup> thymocytes. (B) The percentage of FOXP3<sup>+</sup> cells. \*\*P<0.01. (C) Immunostaining for FOXP3 on paraffin sections of thymus. (D) Profile of CD25 and Foxp3 expression in gated CD4<sup>+</sup> thymocytes. (E) The percentage of FOXP3<sup>+</sup> cell in gated CD4<sup>+</sup> thymocytes. \*P<0.05, \*\*P<0.01. Scale bar=100 $\mu$ m. (n=8) Statistical analyses were carried out using one-way ANOVA with multiple comparison testing. Data are mean $\pm$ s.e.m. All paired images are shown at same magnification.

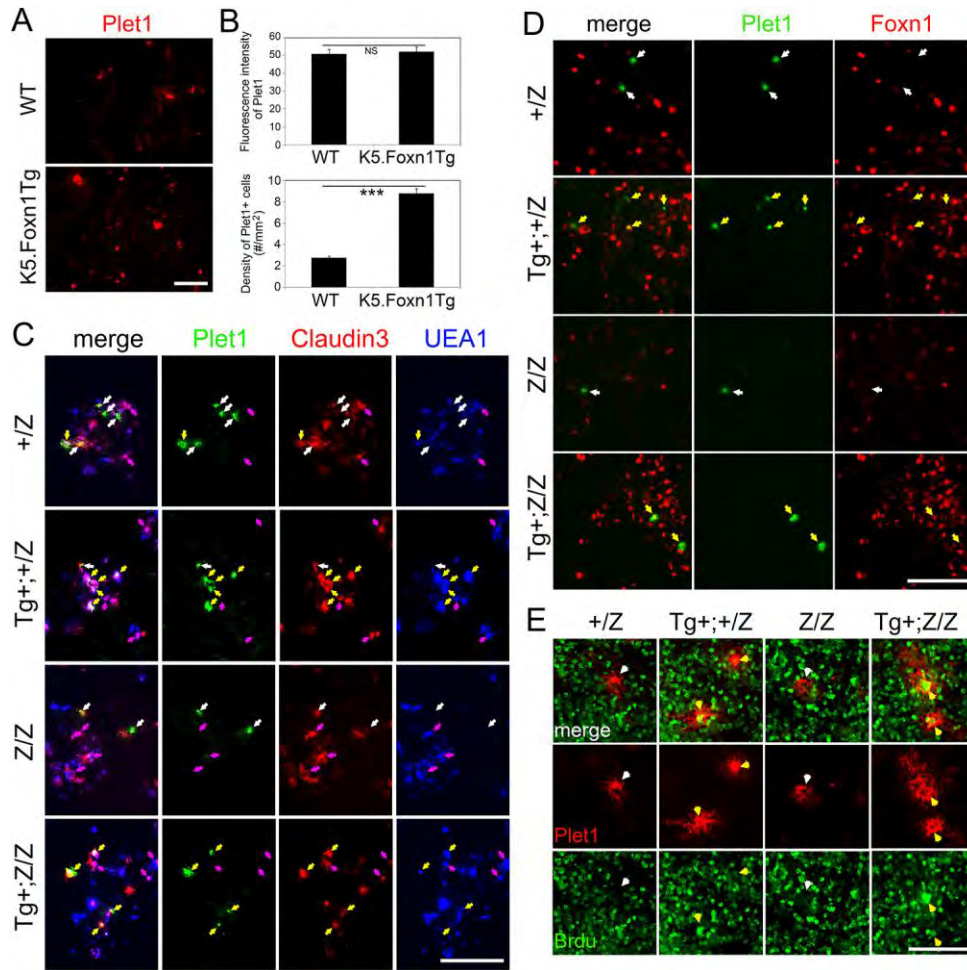

**Fig. 6. The *K5.Foxn1* transgene modulates the phenotype, frequency, and proliferation of TEC progenitors.** All data from one month old mice. **(A)** PLET1<sup>+</sup> cells (red) are increased in *K5.Foxn1* Tg thymus. **(B)** Fluorescence intensity and density of PLET1<sup>+</sup> cells. \*\* $P < 0.01$ . (n=6) **(C)** IHC for PLET1 (green), Claudin3 (red) and UEA-1 (blue). PLET1<sup>+</sup>Claudin3<sup>+</sup>UEA-1<sup>-</sup> cells, white arrows; PLET1<sup>+</sup>Claudin3<sup>+</sup>UEA-1<sup>+</sup> cells, yellow arrows; PLET1<sup>-</sup>Claudin3<sup>+</sup>UEA1<sup>+</sup> cells, pink arrows. **(D)** IHC for PLET1 (green) and FOXN1 (red). PLET1<sup>+</sup>FOXN1<sup>-</sup> cells, white arrows; PLET1<sup>+</sup>FOXN1<sup>+</sup> cells, yellow arrows. **(E)** IHC for PLET1 (red) and BrdU (green). PLET1<sup>+</sup>BrdU<sup>-</sup> cells, white arrows; PLET1<sup>+</sup>BrdU<sup>+</sup> cells, yellow arrows. Scale bar=50 $\mu$ m. Statistical analyses were carried out using one-way Student's t Test. Data are mean $\pm$ s.e.m. All paired images are shown at same magnification.

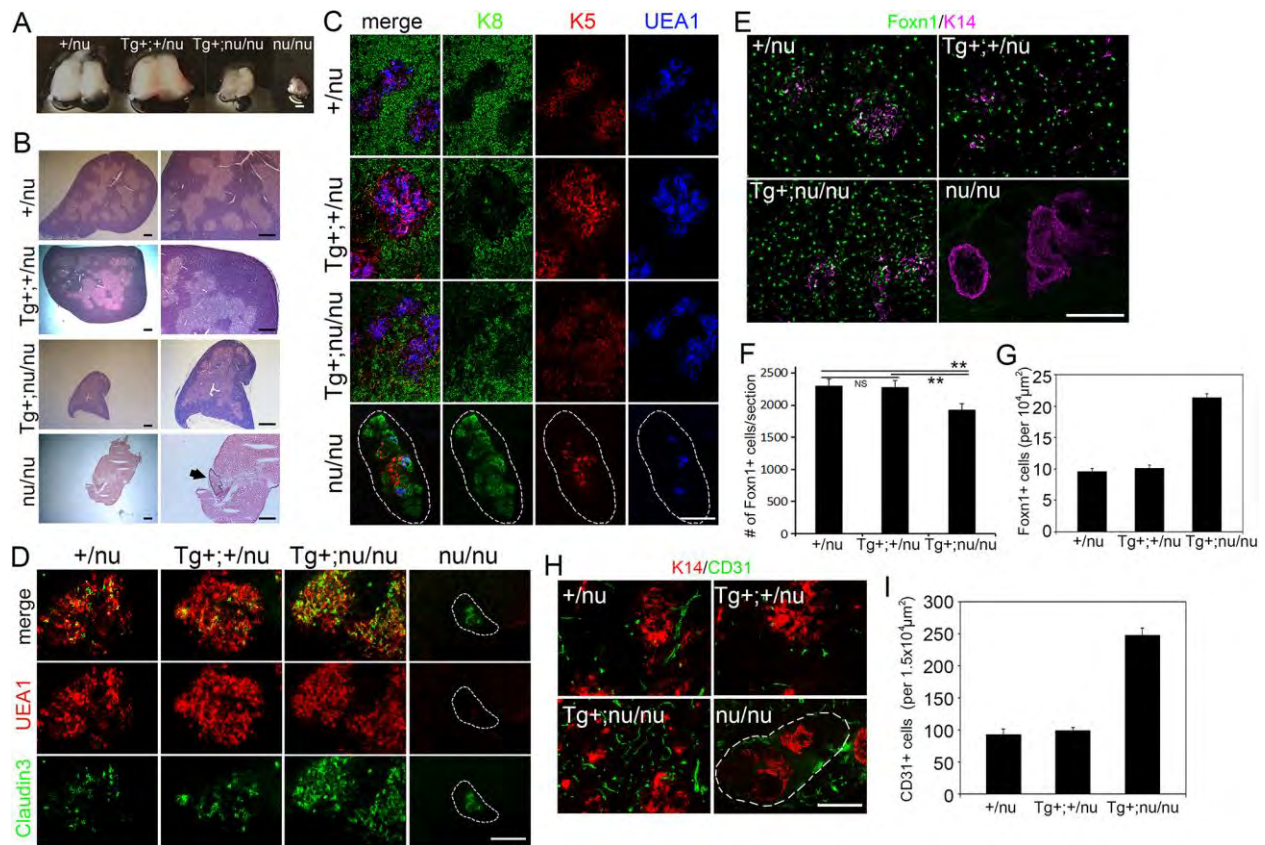

**Fig. 7. The *K5.Foxn1* transgene induces thymus development in nude mice.** All data are from two week old mice. **(A)** Whole dissected thymi from mice with combinations of *Foxn1<sup>nu</sup>* and *K5.Foxn1Tg*. **(B)** H&E of thymi from the indicated genotypes. The right panels are a higher magnification of the left panels; arrow in the *nu/nu* right panel indicates the outlined thymic rudiment. **(C)** IHC for K8 (green), K5 (red), and UEA-1 (blue). White dotted outlines in C, D, and H indicates the thymus boundary in *nu/nu* samples. **(D)** IHC for Claudin3 (green) and UEA-1 (red). **(E)** IHC for FOXN1 (green) and K14 (pink). **(F)** Total numbers of FOXN1+ cells per section, based on cell counts of 3 sections each from the central part of 2 thymi per genotype by IHC. \*\* $P < 0.01$ . **(G)** Numbers of FOXN1+ cells per  $10^4 \mu\text{m}^2$ . **(H)** IHC for CD31 (green) and K14 (red). **(I)** Numbers of CD31+ cells per  $1.5 \times 10^4 \mu\text{m}^2$ . Scale bar= $100 \mu\text{m}$ . Statistical analyses were carried out using one-way ANOVA with multiple comparison testing. Data are mean $\pm$ s.e.m. All paired images are shown at same magnification.

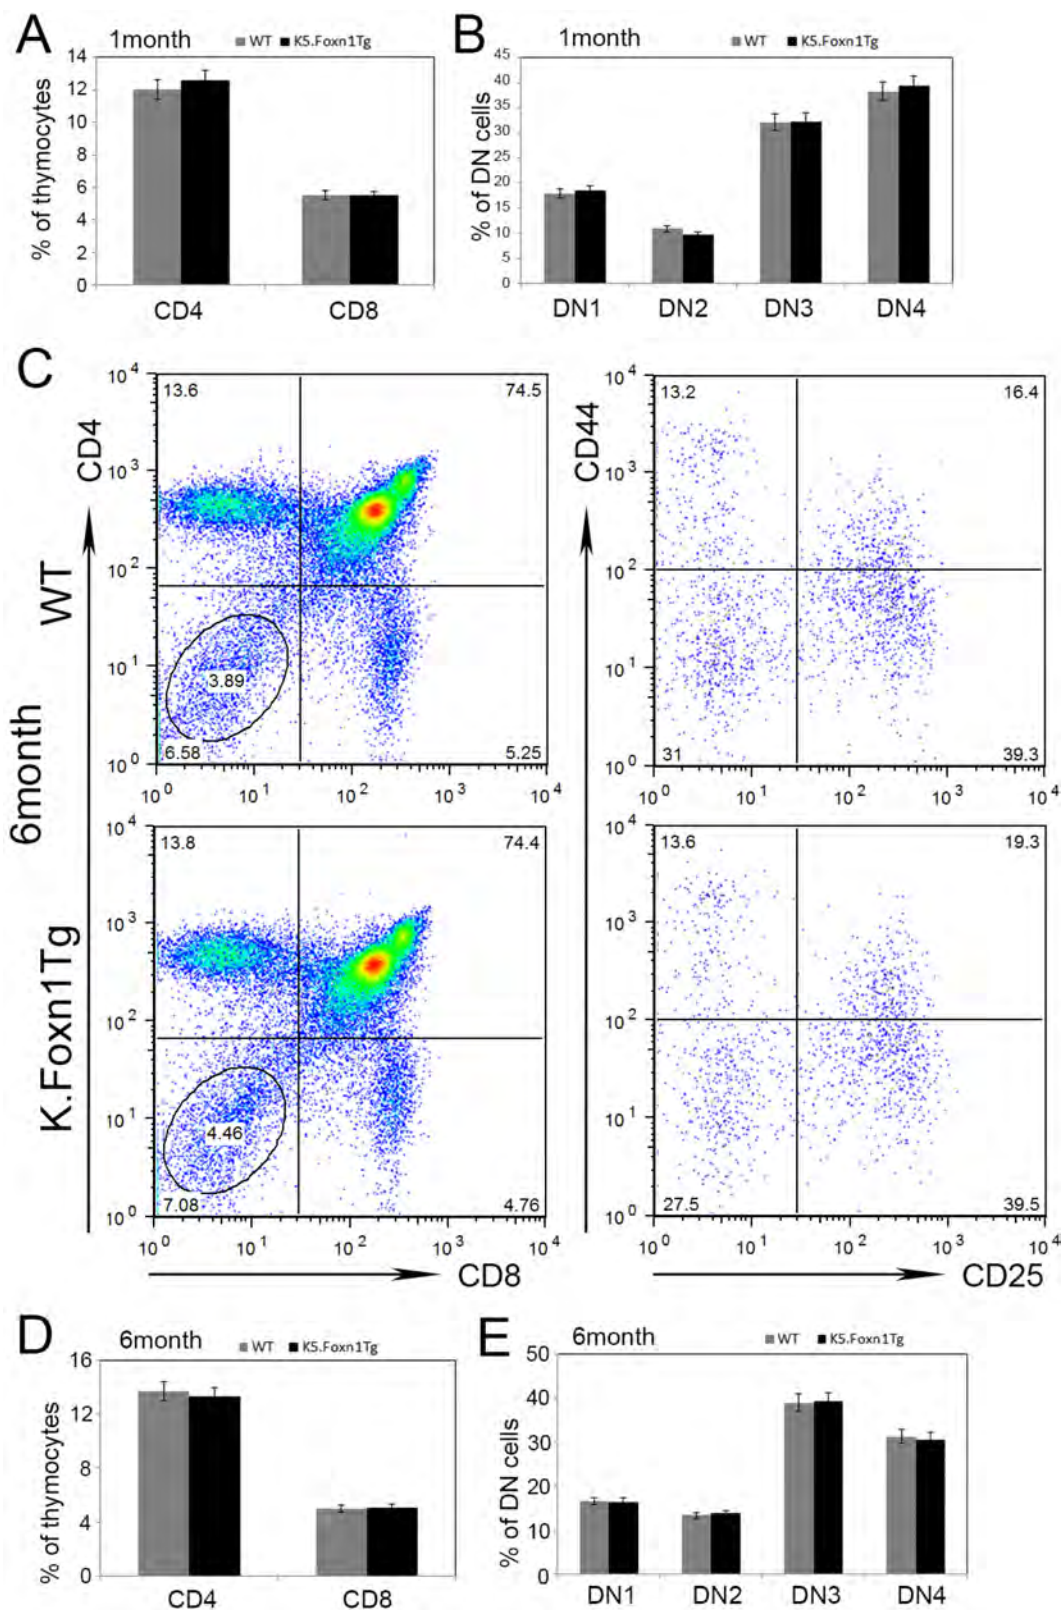

**Fig. S1. Thymocytes in Foxn1Tg mice.** (A) Percentage of CD4 and CD8 SP cells in one month WT and *K5.Foxn1Tg* thymocytes. (B) Percentage of DN1-4 subsets of CD4-CD8<sup>-</sup> cells defined by CD25 and CD44 in one month WT and *K5.Foxn1* Tg thymocytes. (C) Profile of CD4, CD8, CD25, and CD44 expression in *K5.Foxn1* Tg<sup>+</sup> and WT thymocytes at six months old. (D) Percentage of CD4 and CD8 SP cells in six month WT and *K5.Foxn1* Tg thymocytes. (E) Percentage of DN1-4 subsets of CD4-CD8<sup>-</sup> cells in six month WT and *K5.Foxn1Tg* thymocytes. (n=5)

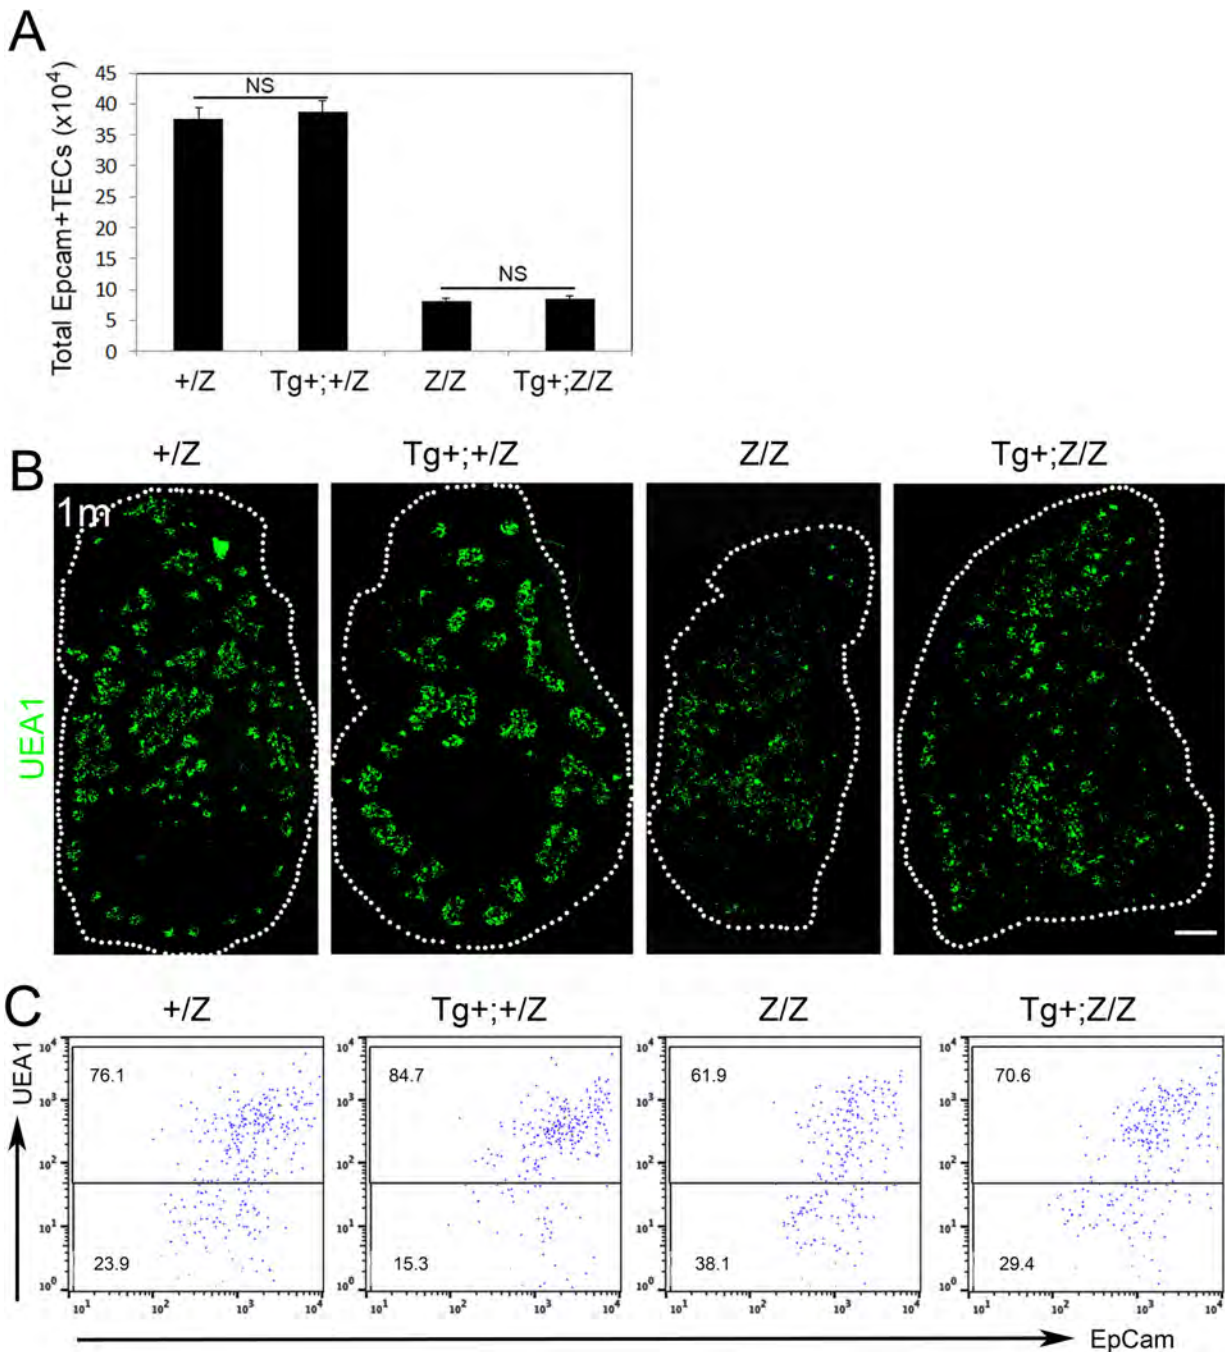

**Fig. S2. UEA1 staining in thymi from *Foxn1*Z/Z with and without the *K5.Foxn1* transgene.** All thymi are from one month old mice. **(A)** Total thymic epithelial cells numbers in +/Z, Tg+;+/Z, Z/Z and Tg+;Z/Z mice. **(B)** UEA-1 (green) on whole sections. The number and intensity of UEA1+ cells were decreased in the *Foxn1*Z/Z mutant. Scale bar=300µm. **(C)** Profiles of EpCam and UEA1 expression in gated CD45- thymic epithelial cells. (n=5) Statistical analyses were carried out using one-way Student's t Test. All paired images are shown at same magnification.



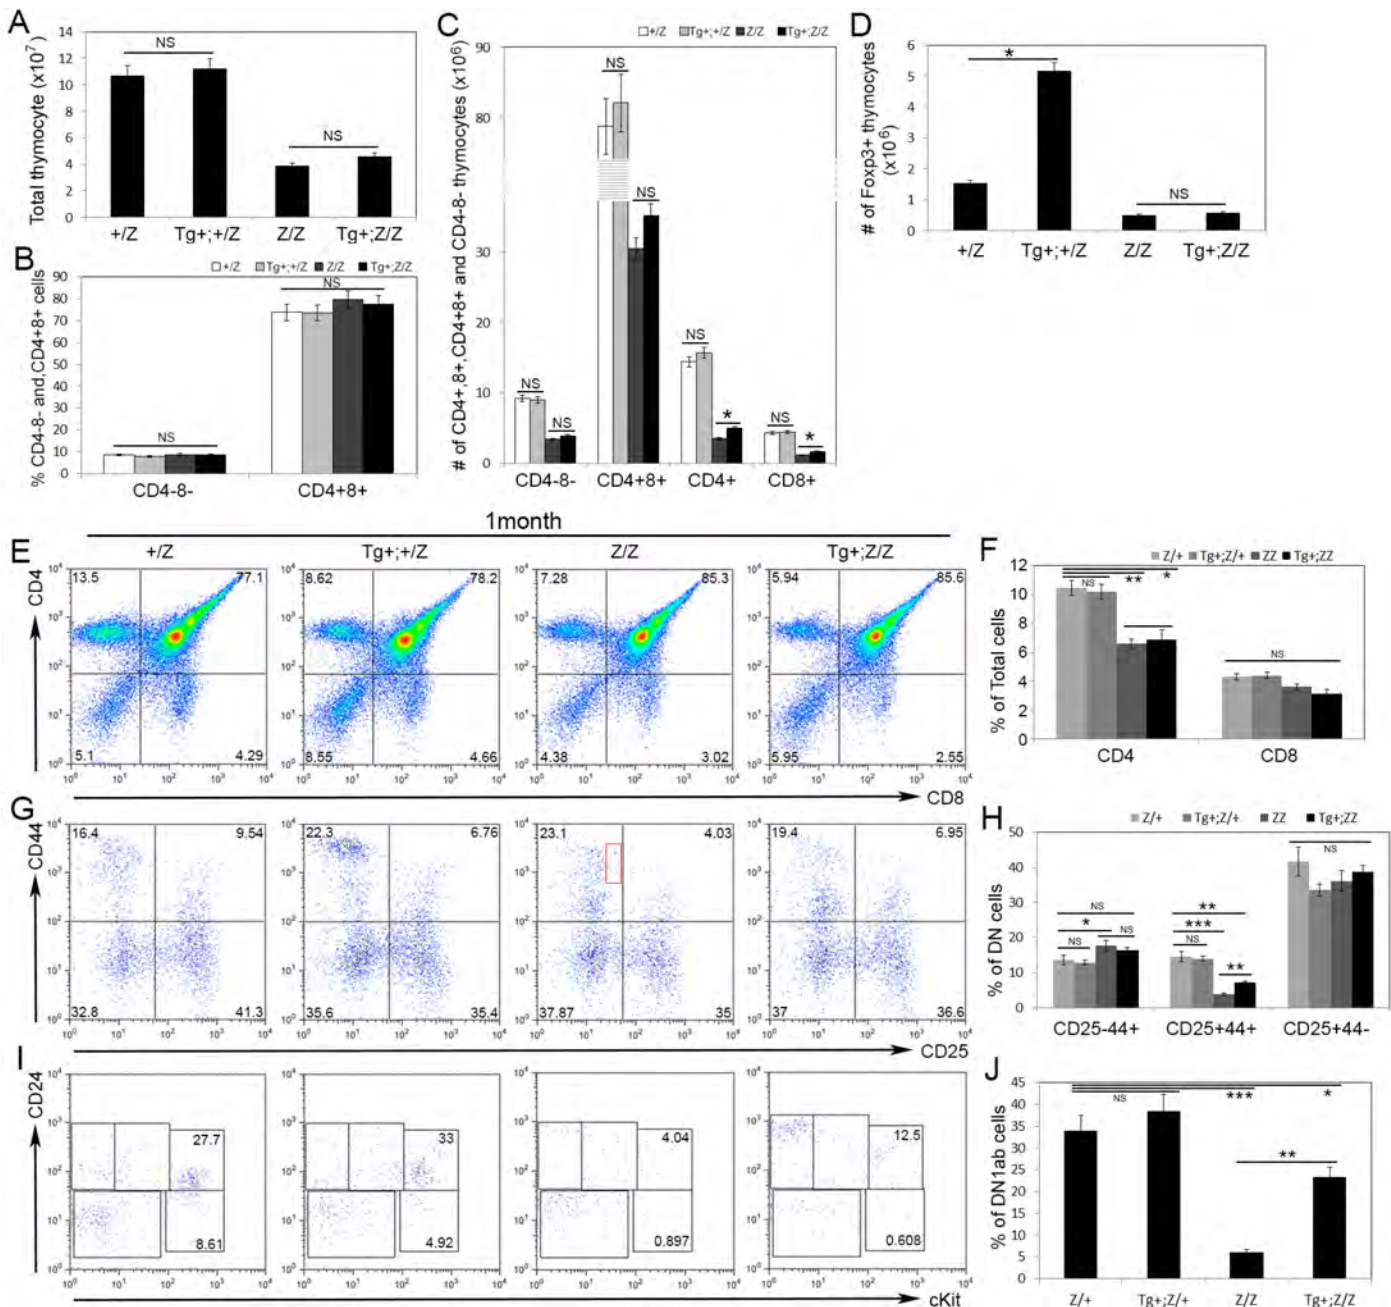

**Fig. S3. Thymocyte phenotypes in one and 6 month old *Foxn1*Z/Z with and without the *K5.Foxn1* transgene.** Samples were from six month (A-D) (n=8) and one month (E-J) (n=6) mice. (A) Total thymocyte numbers in +/Z, Tg+;+/Z, Z/Z and Tg+;Z/Z mice. (B) Percentage of CD4-8- and CD4+8+ thymocytes in total thymocytes. (C) Numbers of CD4-8-, CD4+8+, CD4+ and CD8+ cells in thymus. \*P<0.05. (D) Total number of Foxp3+ cells in thymus. \*P<0.05. (E) Profile of CD4 and CD8 expression in +/Z, Tg+;+/Z, Z/Z and Tg+;Z/Z thymocytes. (F) Percentage of CD4 and CD8 SP cells in +/Z, Tg+;+/Z, Z/Z and Tg+;Z/Z thymocytes. \*P<0.05, \*\*P<0.01. (G) Profile of CD25 and CD44 expression in gated CD4-CD8- thymocytes. (H) Percentages of CD4-CD8- subsets defined by CD25 and CD44 expression. \*P<0.05, \*\*P<0.01, \*\*\*P<0.005. (I) Gated lin-CD25-CD44+ thymocytes stained for CD24 and CD117 expression. (J) Percentages of CD117+CD24high and CD117+CD24low cells in +/Z, Tg+;+/Z, Z/Z and Tg+;Z/Z mice. \*P<0.05, \*\*P<0.01, \*\*\*P<0.005. Statistical analyses were carried out using one-way ANOVA with multiple comparison testing.

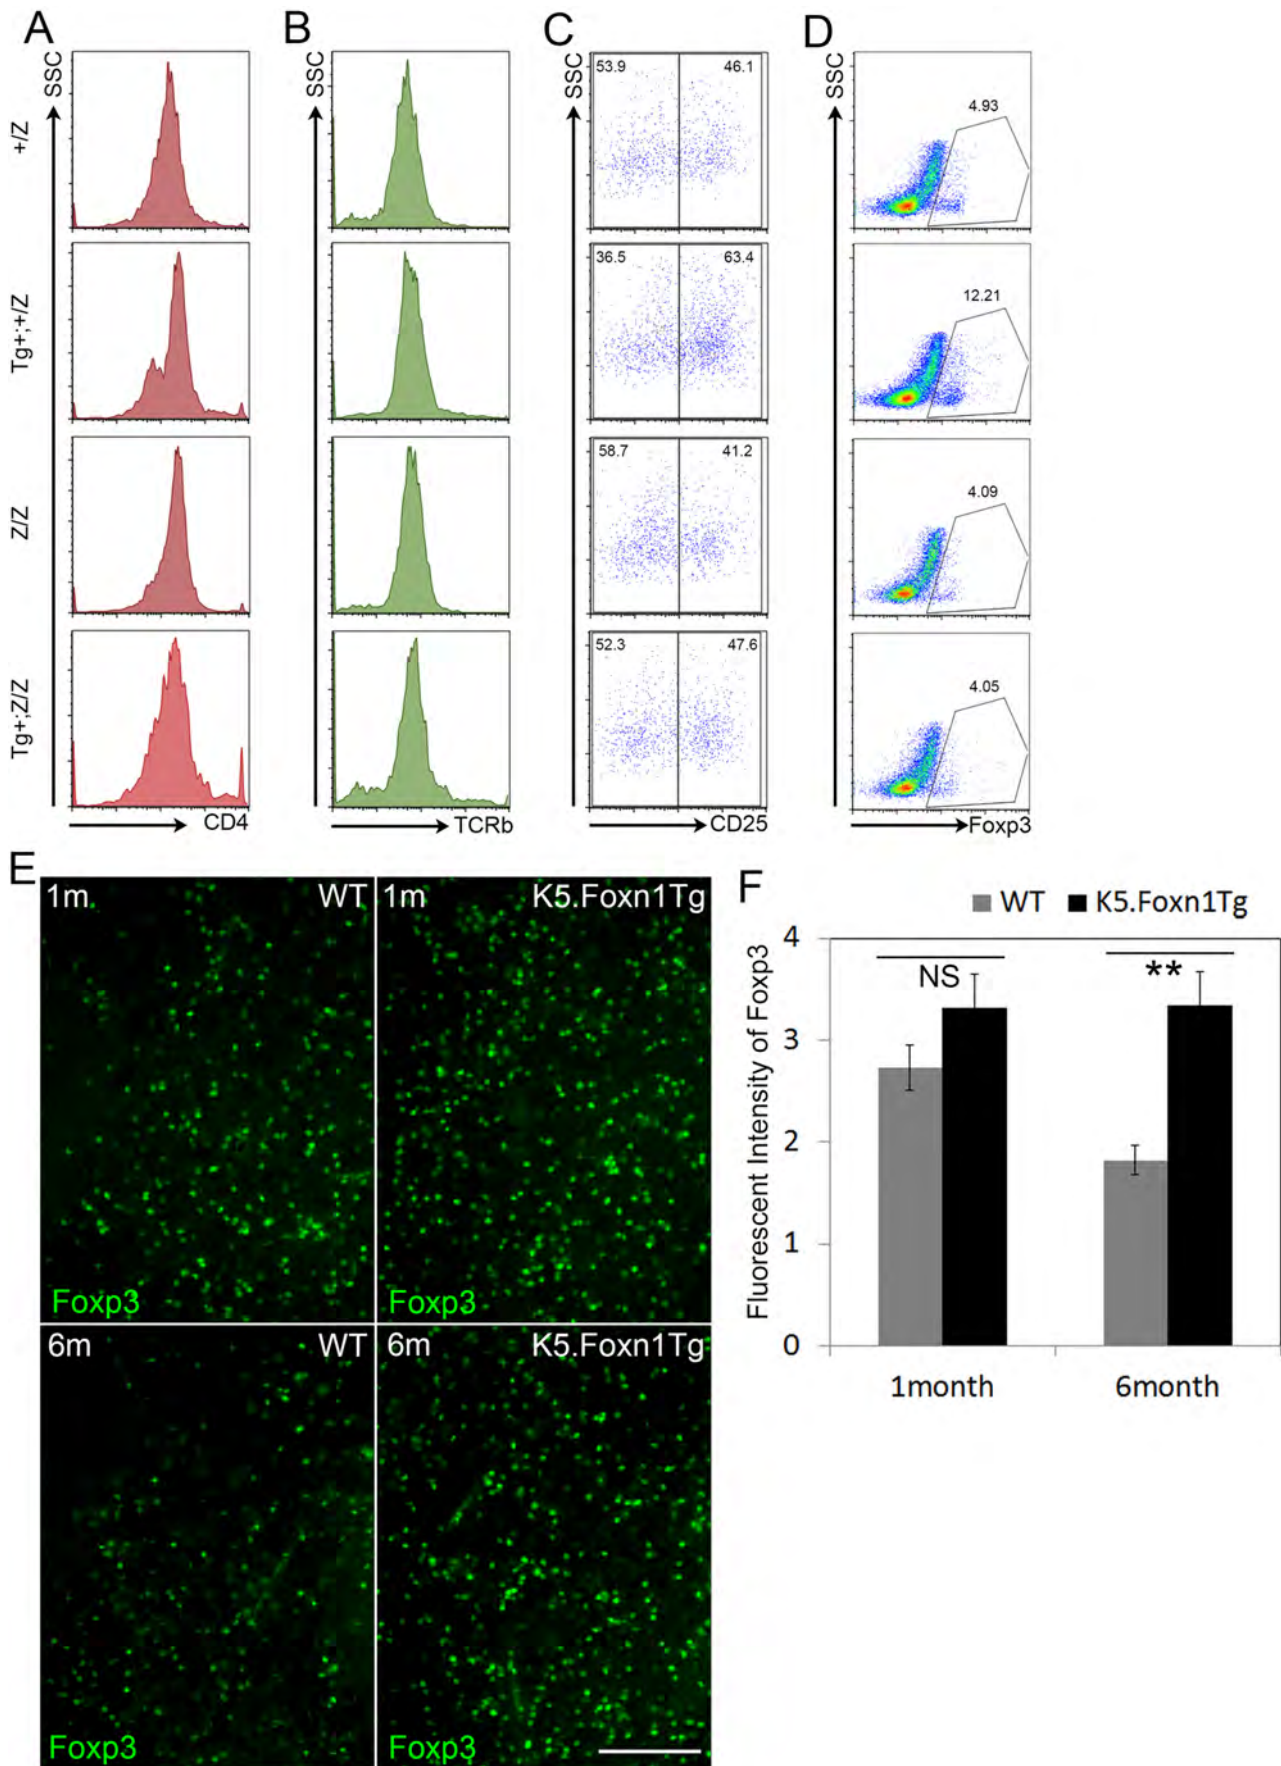

**Fig. S4. Characterization of Foxp3<sup>+</sup> thymocytes from *Foxn1*<sup>Z/Z</sup> thymus with and without the *K5.Foxn1* transgene.** A-F are from 6 month thymi. (A-B) Profiles of gated Foxp3<sup>+</sup> cells shows similar MFI of CD4 (A) and TCRβ (B). (C) Profile of CD25 expression in gated Foxp3<sup>+</sup> thymocytes. (D) Profile of Foxp3 expression in gated CD4<sup>+</sup> thymocytes. (n=5) (E) Fluorescent immunostaining off FOXP3 on one month and six month old thymus. (F) Fluorescent intensity of FOXP3 analyzed by ImageJ. \*\*P<0.01. Scale bar=100μm. (n=7) Statistical analyses were carried out using one-way Student's t Test. All paired images are shown at same magnification.

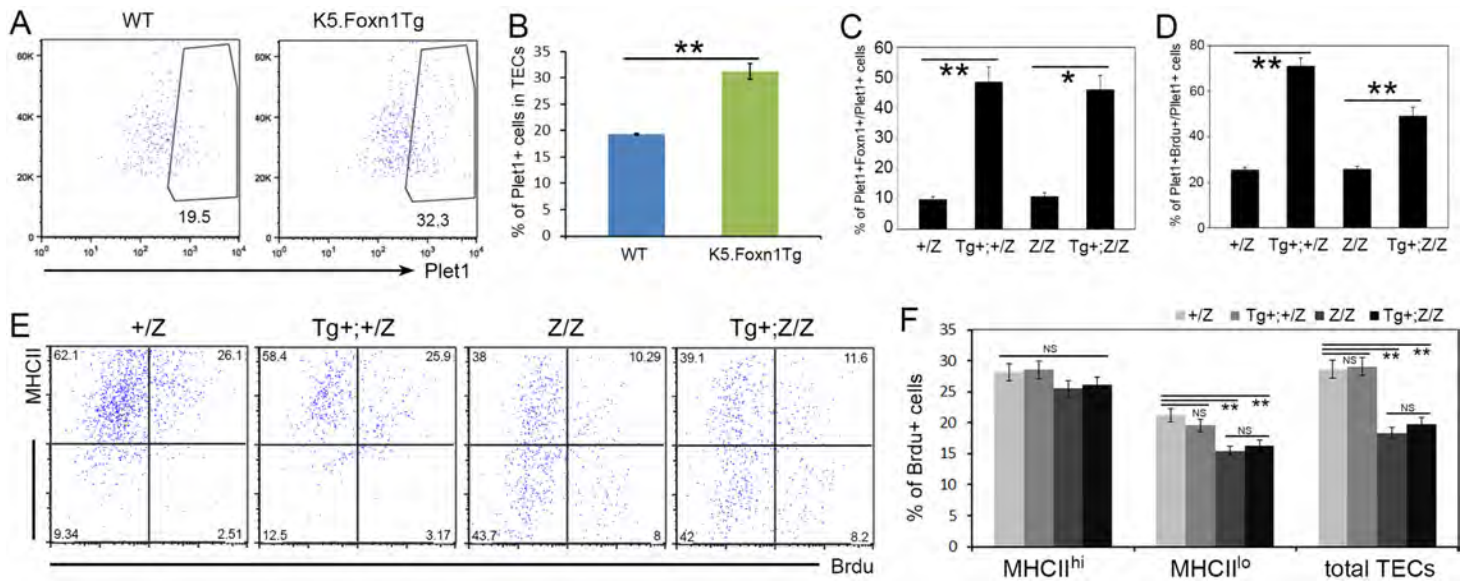

**Fig. S5. Characterization of PLET1 and MHCII on TECs from *Foxn1*Z/Z thymus with and without the *K5.Foxn1* transgene.** (A) Profile of PLET1 expression and (B) percentage of PLET1+ cells in CD45-EpCam+ WT and *K5.Foxn1* thymic epithelial cells. \*\*P<0.01. (C) Percentages of PLET1+FOXN1+ cells in PLET1+ thymic epithelial cells and (D) of PLET1+BrdU+ cells in PLET1+ thymic epithelial cells quantified from IHC shown in Figure 5. \*P<0.05, \*\*P<0.01. (E) Thymic epithelial cells from one month old BrdU treated mice stained for BrdU and MHCII. (F) Percentage of BrdU+ populations in MHC<sup>hi</sup> and MHC<sup>lo</sup> thymic epithelial cells from panel E. \*\*P<0.01. (n=7) Statistical analyses were carried out using one-way ANOVA with multiple comparison testing.

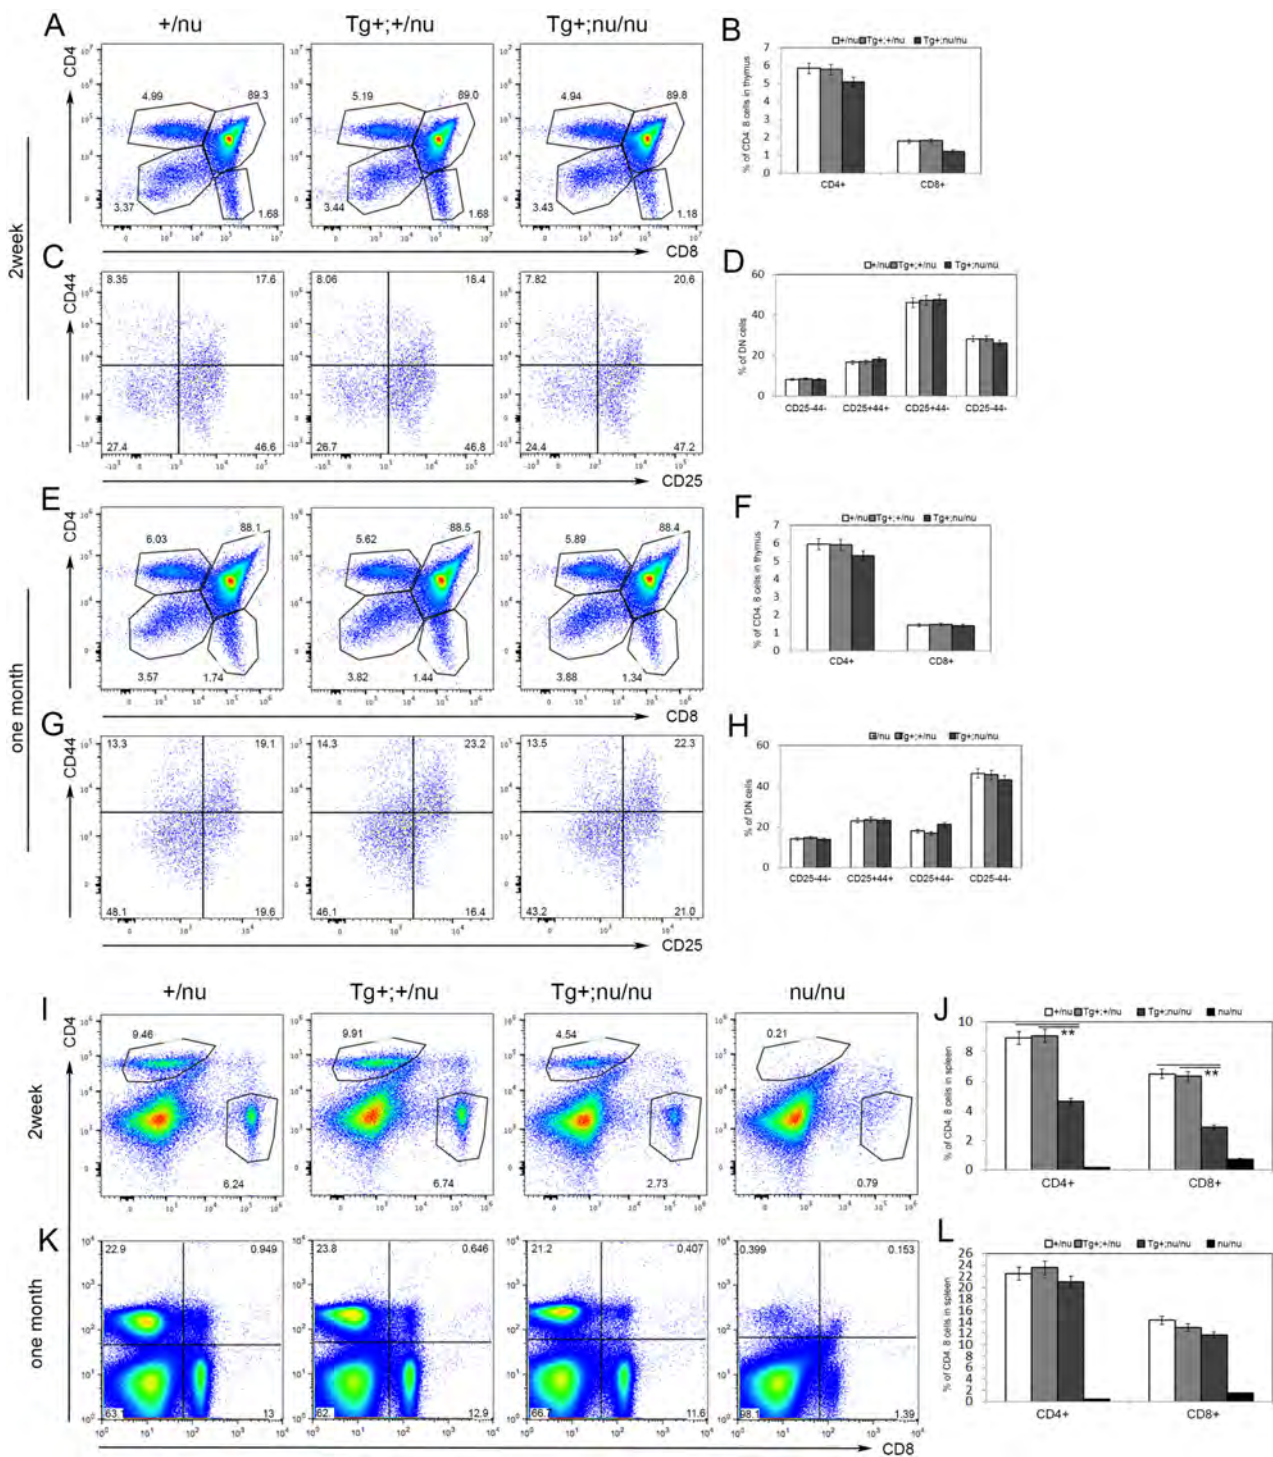

**Fig. S6. CD4 and CD8 cells restoration in thymus and spleen in *K5.Foxn1Tg;nu/nu* mice.** Samples were from 2 week (A-D, I, J) and one month (E-H, K, L) mice. (A) Profile of CD4 and CD8 expression in 2 week-old +/nu, Tg+;+/nu, Tg+;nu/nu thymocytes. (B) Percentage of CD4+ and CD8+ thymocytes in total thymocytes. (C) Profile of CD25 and CD44 expression in gated 2 week-old CD4-CD8- thymocytes. (D) Percentages of CD4-CD8- subsets defined by CD25 and CD44 expression from 2 week-old thymus. (E) Profile of CD4 and CD8 expression in one month old +/nu, Tg+;+/nu, Tg+;nu/nu thymocytes. (F) Percentage of CD4+ and CD8+ thymocytes in total thymocytes. (G) Profile of CD25 and CD44 expression in gated one month-old CD4-CD8- thymocytes. (H) Percentages of CD4-CD8- subsets defined by CD25 and CD44 expression from one month-old thymus. (I) Profile of CD4 and CD8 expression in 2 week-old +/nu, Tg+;+/nu, Tg+;nu/nu spleen cells. (J) Percentage of CD4+ and CD8+ cells in 2 week-old spleen cells. \*\*P<0.01. (K) Profile of CD4 and CD8 expression in one month-old +/nu, Tg+;+/nu, Tg+; nu/nu spleen cells. (L) Percentage of CD4+ and CD8+ cells in one month-old spleen cells. (n=5) Statistical analyses were carried out using one-way ANOVA with multiple comparison testing.

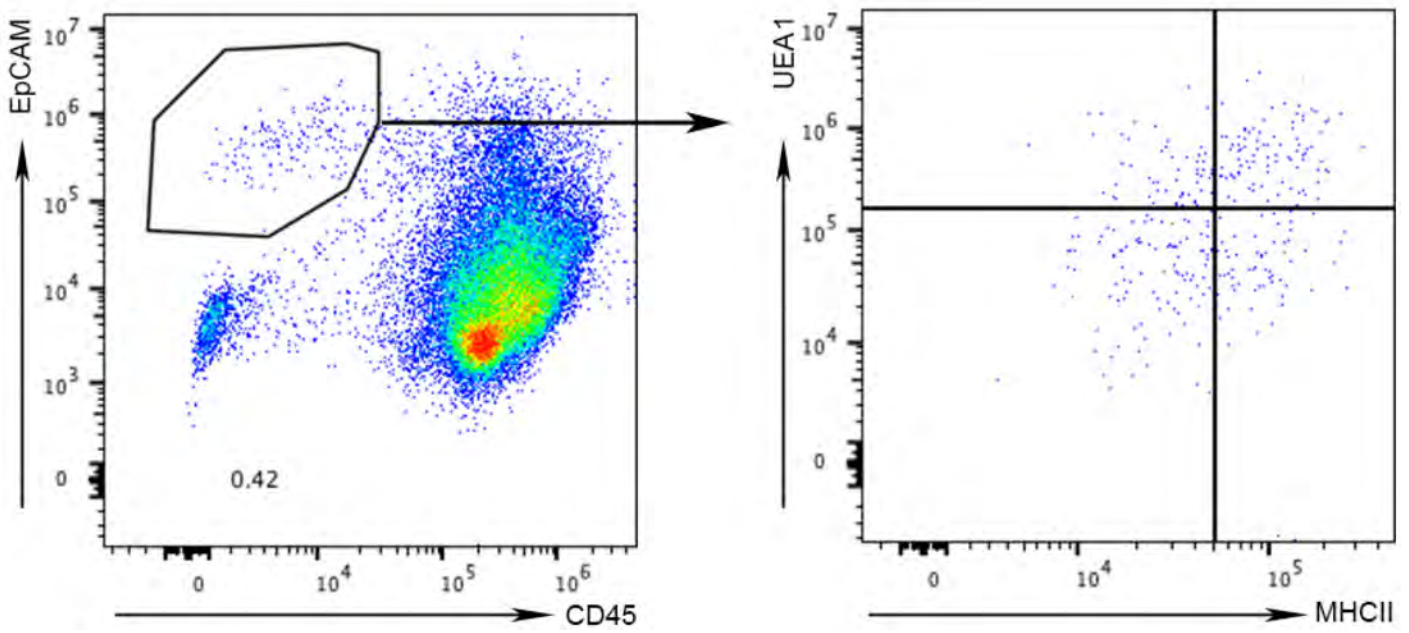

**Fig. S7.** Cell sorting profiles and gating based on expression of CD45, EpCam, UEA1 and MHCII used for RT-PCR analysis of total *DLL4* expression and *Foxn1* expression.

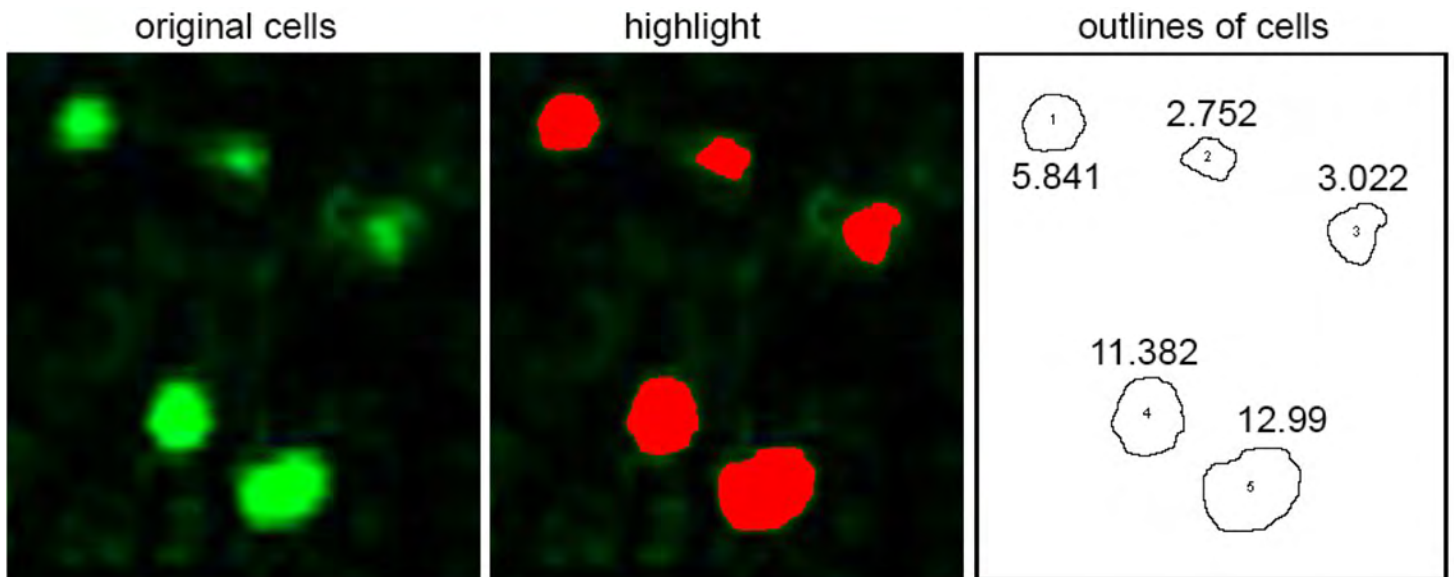

**Fig. S8.** The measurement of fluorescent intensity on IHC results. Left panel is the original IHC of *Foxn1*, middle panel shows how ImageJ recognizes each cell with different shapes. The numbers on the right panel are the fluorescent intensity automatically generated by ImageJ.
